# Supplementary material for: MicroAnnot: A Dedicated Workflow for Accurate Microsporidian Genome Annotation
Source: Preprints.org preprint supplement (doi:10.20944/preprints202310.1822.v1), 2023-10-30
Supplement: Supplementary file 1 [file Supplementary_Table_S1.xlsx]

## Sheet: a) corrected TIS
chromosome accession number	correct CDS boundaries		mispredicted CDS boundaries by microannot		CDS size difference
NC_003242	13741	14457
	38038	38772					red :Bad TIS predicted by MicroAnnot
	41477	41872					green : good TIS predicted by MicroAnnot
	52801	53643	52801	53688	-45		orange : warning for manual annotation
	54174	55397
	58024	58734
	61343	62470
	64152	64862
	66077	66802
	74157	74765	74157	74876	-111
	79055	80473
	83716	83886				not detected
	85944	86369
	87849	88652	87849	88736	-84
	89911	90549
	92350	92967	92350	92988	-21
	96738	97295	96738	97292	3
	101619	102416	101643	102416	-24
	104764	105099
	105857	106297	105857	106372	-75
	107676	108062				not detected
	108081	108560
	117915	118721	117915	118829	-108
	118826	119548
	120155	121846
	121867	123885
	125625	126545	125625	126737	-192
	138573	140432	138585	140432	-12
	145900	146454
	149079	150806
	158993	160219
	166077	166625
	195526	196146	195526	196242	-96
NC_003229	13711	15762	13711	15774	-12
	15886	16881
	16998	18722	16998	18752	-30
	32734	33825
	33890	34303
	49899	51371
	52450	54297	52435	54297	15
	69634	70383
	70475	72811
	73719	74264
	94542	95093
	95701	97038
	99020	100519
	102180	104066	not predicted (overlap)
	110397	110999
	111594	112046
	113724	114407
	114752	114973
	118301	119257
	130217	135634	131231	135634	1014
	135717	136223
	139110	139733
	139837	140436	139780	140436	57
	140506	141039	140506	141006	33
	141112	141528
	161954	163459
	163539	165518
	182779	183876
NC_003230	8081	8389	7712	8389	369
	8576	10420	8576	10444	24
	18891	20294	18858	20294	33
	20985	21986	20985	22004	18
	29208	29612	29208	29645	33
	42356	43972	42263	43972	93
	48410	49444
	52875	54059
	54192	57344
	57828	58904
	68338	70482	68290	70482	48
	70587	73013	70587	73025	12
	74435	74992	74390	74992	45
	79464	79787	79464	79910	123
	82661	82978
	86105	88825
	92875	93687	92806	93687	69
	95770	99126	95644	99126	126
	99685	99975
	106631	107989	106625	107989	6
	109718	110632
	122756	124378
	125346	126362	125301	126362	45
	127498	127980
	135766	136236
	137355	137873
	149514	150794	149514	150848	54
	189402	189857
NC_003231	20442	21011
	22020	22493	21921	22493	99	overlap
	25546	26685
	33664	34059	33664	34134	75
	35205	35714
	39074	40864	39074	40897	33
	48914	49648
	53421	54479
	64061	64477
	68782	69441	68734	69441	48
	71424	72956
	79673	80572	79721	80572	-48
	80553	81257	80553	81194
	94657	100650
	101868	102593
	119771	120679	119750	120679	21
	128957	133906	128804	133906	153
	139795	141963
	143627	145042
	156082	158496	156067	158496	15
	159226	160218
	160292	161017
	161171	162259	161144	162259	27
	162370	164127
	165802	168411	165802	168447	-36
	174442	175461	174379	175461	63
	180971	182779	180971	182743	36
	190762	191406
	191601	193136
	193342	194421
	195437	196180
	201927	202730
	203275	205107	203224	205107	51
	206449	207597
	208018	208395
	209287	209559
	213230	213829	not detected
NC_003232	3775	5148	3679	5148	96
	14822	16747
	22937	23920
	24236	24979
	25067	26287
	31007	32251
	34814	35167	34814	35218	51
	36827	37582
	40579	41259
	46346	47539
	51543	52088
	57660	58874
	88170	89015
	92708	92932
	95401	96085
	97162	98355
	101133	102203
	106006	106179
	106238	108385
	108708	109478
	114382	115275	114382	115392	117
	115344	116702
	126995	127750	126884	115392
	127779	128852	127779	128876	24
	129413	132241
	138821	139984	138755	139984	66
	148189	149310	148177	149310	12
	155390	156112	155390	156151	39
	159239	159934	159239	159970	36
	162582	164279	162303	164279	279	overlap
	165824	166855	165851	166855	27
	166897	168132	166852	168132	45
	176209	176715
	176969	178063
	179386	179976
	192038	192910
	196193	196753
	198643	199539	198664	199539	21
NC_003233	14220	14645
	29605	30216
	30276	32720	30276	32927	207
	32819	33463
	44903	45319
	47511	48167	47322	48167	189
	48229	48909
	48950	51157
	58840	60633
	62220	62723
	62798	65587
	71761	72579
	75994	76797	76087	76797	93
	77443	78201
	86756	87312	86914	87312	158
	89827	90642	89980	90642	153
	110414	112846
	112946	113518
	113566	114006
	123319	127755	123310	127755	9
	139455	139895
	139932	140408
	142301	142942
	143827	144846	143827	144879	33
	147840	148124
	152966	153655	not detected
	153667	154638
	155894	157501	157519	157501	1625
	165935	166480
	173613	174578
	194030	195094
	195758	197224
	198523	200607
	202635	204188	202653	204188	18
NC_003234	4358	5044
	5249	5647	5249	5899	252
	7406	9154
	10241	14191
	22116	23111
	23602	24780
	27913	28344
	29377	32058	29368	32058	9
	36031	36915	36028	36915	3
	43589	44506	43589	44533	27
	57215	58105	57215	58129	24
	63903	65237	64101	65237	198
	67846	69015
	70314	71552
	76393	77265	not detected		not detected
	87227	90544
	91679	92275
	92342	92851	not detected		not detected
	92895	93410
	100312	101760
	103009	103977
	104034	104834
	117463	117765
	118551	118835
	118877	119485
	119838	120059
	120104	121147
	134243	134791
	139862	140206	139790	140206	72
	140222	140482
	140607	141656	140583	141656	24
	144659	146701	144356	146701	303
	147186	147422
	147494	148108
	149272	150228
	156628	158280
	158965	159444	not detected		not detected
	159488	160249	159428	160249	60
	160356	160751
	173167	176592
	204733	205529	204993	205529	260
	210847	211260	not detected		not detected
	215534	215743
	224581	225882	224587	225882	6
NC_003235	18127	20088
	20315	21601
	24972	26372
	29718	32579
	33746	34864	33719	34864	27
	41789	42469	41789	42529	60
	43502	43852	43556	43852	54
	44428	45369
	46798	47277	46798	46531	746	overlap
	52424	53665
	54676	55227	54631	55227	45
	55277	55600	55277	55630	30
	56838	57470
	59222	59917
	59928	60311	not detected
	60368	61609
	66807	67694
	67701	68132	67701	68189	57
	69186	70943	69186	70955	12
	71090	71656
	73964	75757
	75783	76628
	86750	87343
	88113	88727	88113	88751	24
	88720	90921
	90977	91339
	93247	94080	93226	94080	21
	97217	99577	97190	99577	27
	107581	107841
	113318	115357	not detected
	115418	117262
	117346	117681	117346	117705	24
	117812	118306	117746	118306	66	intron not detected
	122755	124437
	122755	124437
	133963	136755
	139780	140082
	140491	141771
	142790	144955
	148652	149608	148652	149728	120
	151478	151762
	155453	155842	155522	155842	69
	155874	156284	155874	156326	42
	157395	158141	157395	158102	39
	160949	162823
	169086	170075
	172442	173053	172472	173053	30
	175859	177442	175859	177496	54
	184646	185404
	185513	186295
	186358	187062	186358	187119	57
	187184	187846
	190660	192105
	193308	193849
	195912	196667
	196703	197296
	201217	203574	201187	203574	30
	213196	213513
	215526	216617
	219127	219414
	219762	220493
	222758	223228	222734	223228	24
NC_003238	7387	9366	7387	9240	126
	15344	15856
	15968	16570
	16738	18195	16774	18195	36	intron not detected
	24367	24963
	42332	44779
	44964	46175	44964	46217	42
	53880	55943
	72461	73282	72461	73396	114
	73344	74462
	85196	86482	85196	86476	6
	86606	87067
	90361	91494	90361	91515	21
	93020	93838	93041	93838	21
	94859	95200
	100777	101346
	103269	104072
	105533	105775
	108538	110505
	110630	111127	110594	111127	36
	113022	114026
	119146	120054
	120095	120877
	123931	124554
	125721	126329
	127260	128066
	130670	132373
	133647	135251
	137458	138624
	143294	143944
	145200	146183	145200	146213	30
	146523	147038
	147099	147587
	147661	148071
	148120	148986
	158847	159581
	159725	160183	159725	160732	549
	165891	166754
	169941	170573
	174234	175922	174234	175937	15
	176268	177749
	182631	183023
	189457	190920	189694	190920	237
	191006	192241
	193614	196220
	196279	197634
	202642	203853
	206583	207983	206583	208034	51
	220272	221450
	221733	222887	221733	222773	114
NC_003236	695	1954	695	1990	36
	8528	9013
	10834	11043
	17845	18234
	20433	21539
	23333	24322
	40874	41485
	42622	43038
	43120	43971
	43960	45498	43960	45504	6
	53935	55788
	57458	60637
	67615	68325
	68377	69387
	70456	71796	70456	71691	105
	71897	73615
	88448	89332	88277	89332	171
	95081	96742
	96974	99742
	99768	100826
	106611	107156
	121321	123252
	131357	132619
	132702	133577	132702	133622	45
	134344	135717
	141391	142866
	153061	155712
	163070	168457
	170790	173276
	173340	175964	173340	176000	36
	176080	177144	176080	177141	3
	185942	187588
	187651	188619
	207507	207962
	208503	209072	208515	209072	12
	209452	210594
	217139	217414
	220443	221717
	224045	226375	224027	226375	18
	230313	231662
	233384	235279	233393	235279	9
	236141	237337
	250029	251879
NC_003237	13954	14292
	18288	19163
	20029	20577
	23728	26358
	29938	33012
	42534	44633
	47538	48281	47538	48302	21
	57130	57609
	61074	65312
	75069	75257	not detected
	91577	92974
	93072	94073
	95703	96686
	97808	98251
	101816	102328
	108879	109205
	128573	128857
	131766	132179	131766	132215	36
	135892	136572
	136648	137004
	140172	141452	140172	141326	126
	143584	144108
	152384	154120
	154202	154354
	155525	156274	155525	156304	30
	156308	157015
	157094	157939
	163891	164838	163891	164877	39
	164927	166030	164927	166213	183
	167431	167871	167404	167871	27
	171778	172032
	177351	177893
	182293	183048
	183117	186887	183117	187028	141
	191499	192464
	192508	193365	192463	193365	45
	209170	209862
	209926	210318
	230189	232165
	233031	233357	not detected
	235585	237021
	241887	242915
	245162	245710
	245766	246836
	250146	250652
	253911	254306	253911	254327	21
	256161	257285
	261775	262260

## Sheet: a) falsely predicted genes
chromosome accession number	boundaries		CDS predicted by Microannot
NC_003242	43991	44299	NO
NC_003231	48429	48779	NO		green : Bad gene not predicted by MicroAnnot
NC_003232	21722	22096	NO
	200107	200637	NO
NC_003232	91291	92079	NO
NC_003234	178917	179324	NO
NC_003235	95176	95499	NO
	164329	164781	NO
	194985	195560	NO
NC_003237	17190	17720	NO
	20576	21004	NO

## Sheet: a) intron prediction
chromosome accession number	correct CDS boundaries
NC_003233	86756	87312
NC_003234	204733	205529
NC_003238	16738	18195
				red : intron not predicted by MicroAnnot
				green : intron predicted by MicroAnnot

## Sheet: a) unpredicted gene
chromosome accession number	correct CDS boundaries		CDS size	CDS Predicted by MicroAnnot
NC_003242	44035	44310	275	YES
	66929	67195	266	YES	red : gene not predicted by MicroAnnot
	71022	71237	215	YES	green : gene predicted by MicroAnnot
	111169	111411	242	YES
	123947	124168	221	YES
	167877	168143	266	YES
NC_003229	27594	27869	275	YES
	29134	29307	173	YES
	42997	43251	254	YES
	49644	49817	173	YES
	67947	68147	200	YES
	74363	74656	293	YES
	86682	86936	254	YES
	94112	94489	377	NO
	101882	102118	236	YES
	104931	105110	179	YES
	168542	168724	182	YES
	182183	182353	170	YES
NC_003230	28954	29124	170	YES
	45954	46217	263	YES
	46250	46510	260	YES
	135419	135673	254	YES
	140713	140883	170	YES
	164915	165208	293	YES
	177226	177624	398	YES
	183667	183942	275	YES
NC_003231	19114	19281	167	YES
	21451	21615	164	YES
	21685	21963	278	YES
	52214	52447	233	YES
	61296	61666	370	NO
	70515	70772	257	YES
	90615	90887	272	YES
	91664	92164	500	NO
	120724	121050	326	NO
	133980	134153	173	YES
	173787	174011	224	NO
	184102	184392	290	YES
	184432	184650	218	YES
	185748	185942	194	YES
	202852	203085	233	YES
	206132	206326	194	YES
	205868	205954	86	YES
	207673	207840	167	YES
NC_003232	16820	17263	443	NO
	17320	17535	215	NO
	20245	20442	197	YES
	27931	28113	182	YES
	64687	64953	266	YES
	108421	108663	242	YES
	140029	140292	263	YES
	154584	154859	275	YES
	189237	189464	227	YES
	157270	157425	155	YES
	168182	168310	128	YES
NC_003233	21283	21519	236	YES
	21585	21782	197	YES
	23744	23968	224	YES
	26497	26697	200	YES
	40665	40766	101	YES
	55228	55494	266	YES
	58353	58715	362	YES
	76983	77234	251	YES
	78290	78556	266	YES
	81124	81423	299	YES
	130862	131044	182	YES
	150884	151105	221	YES
	158151	158501	350	YES
	158566	158865	299	YES
	179288	179521	233	YES
	182214	182429	215	YES
NC_003234	48136	48462	326	NO
	62580	62873	293	YES
	111237	111362	125	YES
	111407	111652	245	YES
	119537	119776	239	YES
	121197	121472	275	YES
	124010	124192	182	YES
	134766	134984	218	YES
	160835	161089	254	YES
	195045	195254	209	YES
	195791	196060	269	YES
	211391	211618	227	YES
	215534	215809	275	YES
NC_003235	23526	23717	191	YES
	37377	37562	185	YES
	43972	44172	200	YES
	59011	59166	155	YES
	64461	64700	239	YES
	68308	68517	209	YES
	78332	78475	143	YES
	111841	112113	272	YES
	133188	133418	230	YES
	140156	140427	271	YES
	159723	160001	278	YES
	162830	163012	182	YES
	172228	172386	158	YES
	194992	195720	728	NO
	203729	203983	254	YES
NC_003238	37871	38158	287	YES
	56851	57048	197	YES
	62066	62194	128	YES
	75388	75720	332	NO
	80121	80399	278	YES
	105846	106130	284	YES
	114819	115058	239	YES
	116357	116620	263	YES
	138717	138899	182	YES
	143995	144072	77	YES
	173388	173762	374	YES
	186383	186580	197	YES
	193409	193558	149	YES
	199153	199407	254	YES
	208093	208224	131	YES
NC_003236	9128	9340	212	YES
	10768	11043	275	YES
	40577	40834	257	YES
	41719	41976	257	YES
	50276	50524	248	YES
	78695	78901	206	YES
	140750	140905	155	YES
	155800	156063	263	YES
	207056	207220	164	YES
NC_003237	23251	23418	167	YES
	28740	28952	212	YES
	53325	53558	233	YES
	72665	72862	197	YES
	75069	75257	188	NO
	80609	80764	155	YES
	81297	81557	260	YES
	88890	89123	233	YES
	124230	124439	209	YES
	134479	134709	230	YES
	148601	148855	254	YES
	154202	154354	152	YES
	182008	182256	248	YES
	214696	214866	170	YES
	220241	220699	458	NO
	244837	245109	272	YES
	257769	258362	593	NO
	258450	259019	569	NO
	259745	259954	209	YES

## Sheet: b) Add corrected TIS
chromosome accession number	correct CDS boundaries
NC_003242	92350	92988
	105857	106372
	107104	107499
	35543	35552
NC_003229	21490	22758
	23807	24250
	31444	32361
	42270	42938
	51425	51946
	54472	55752
NC_003230	7712	8389
	18858	20294
	29208	29645
	42263	43972
	43995	44465
	68290	70482
	74390	74992
	79464	79910
	89486	92014
	106625	107989
	114158	114649
	131284	132126
	185057	185629
NC_003231	17593	18993
	39074	40897
	59424	61079
	68734	69441
	79721	80572
	80553	81194
	161144	162259
	184687	185646
	203224	205107
NC_003232	34814	35218
	98417	100012
	116887	117459
	127779	128876
	198664	199539
NC_003233	33562	34284
	58353	58715
	195758	197224
NC_003234	5249	5899
	57215	58129
	78931	82710
	132056	132865
	210114	210578
	213463	215382
NC_003235	23781	24170
	33719	34864
	41789	42469
	43556	43852
	67701	68189
	93226	94080
	117346	117705
	138327	139643
	152334	153524
	155522	155842
	175859	177496
	183987	184029
NC_003238	7387	9240
	93041	93838
	174234	175937
	189457	189694
	206583	208034
	227170	228393
NC_003236	10768	11043
	70456	71691
	132702	133622
	173340	176000
	219764	220360
	256666	257178
	262104	262451
NC_003237	18288	19163
	148852	151353
	155525	156304
	196430	196544
	204918	205014
	259745	260020

## Sheet: b) Add falsely predicted gene
chromosome accession number	CDS boundaries		CDS Size
NC_003242	11158	11529	372
NC_003230	6782	7153	372
	7642	7953	312
NC_003232	196832	197662	831
NC_003233	7268	7582	315
	165267	165851	585
	212714	213025	312
NC_003235	117746	118306	561
NC_003238	70894	72597	1704
NC_003236	252502	252813	312
NC_003237	17190	17720	531
	20165	21004	840

## Sheet: b)Add unpredicted genes
chromosome accession number	correct CDS boundaries		CDS Size
NC_003242	2700	3281	582
	186	878	693
	174513	175895	1383
	177528	180122	2595
	183040	184140	1101
	206702	207283	582
NC_003229	1	737	737
	1712	2497	786
	3287	4384	1098
	5448	7019	1572
	194238	194711	474
NC_003230	193169	194439	1271
NC_003231	11656	12129	474
	216604	217266	663
	217386	218329	944
NC_003232	1	782	782
	219513	220294	782
NC_003235	233204	233677	474
	237413	237437	25
NC_003238	71617	72021	405
	132512	133594	1083
NC_003236	252066	252743	678
NC_003237	16810	17115	306

## Sheet: c) Falsely Predicted TIS
chromosome accession number	correct CDS boundaries		mispredicted CDS boundaries by MicroAnnot		CDS size difference
NC_003242	52801	53643	52801	53688	-45		red : mispredicted position
	74157	74765	74157	74876	-111		warning
	87849	88652	87849	88736	-84
	101619	102416	101619	101643	773
	117915	118721	117915	118829	-108
	125625	126545	125625	126737	-192
	138573	140432	138573	138585	1847
	172650	174440	172650	174431	9
NC_003229	13711	15762	13711	15774	-12
	16998	18722	16998	18752	-30
	52450	54297	52435	54297	15
	105702	106043	105702	106028	15
	107114	108595	107114	108577	18
	139837	140436	139780	140436	57
	167041	168504	167071	168504	-30
	173091	174725	173124	174725	-33
	175831	177972	175861	177972	-30
NC_003230	20985	21986	20985	22004	-18
	114909	115628	114909	115616	12
	125346	126362	125301	126362	45
	149514	150794	149514	150848	-54
	176061	176663	176079	176663	-18
NC_003231	22020	22493	21921	22493	99
	33664	34059	33664	34134	-75
	79673	80572	79721	80572	-48
	119771	120679	119750	120679	21
	128867	133906	128804	133906	63
	156082	158496	156067	158496	15
	165802	168411	165802	168447	-36
	174442	175461	174379	175461	63
NC_003232	3775	5148	3679	5148	96
	114382	115275	114382	115392	-117
	126995	127750	126884	127750	111
	138821	139984	138755	139984	66
	148189	149310	148177	149310	12
	159239	159934	159239	159970	-36
	162582	164279	162303	164279	-279
	166897	168132	166852	168132	-45
NC_003233	30276	32720	30276	32927	-207
	47511	48167	47511	47322	845
	74313	74780	74313	74744	36
	75994	76797	76087	76797	-93
	89827	90642	89980	90642	-153
	123319	127755	123310	127755	9
	141242	142267	141242	142249	18
	143827	144846	143827	144879	-33
	155894	157501	155894	157519	-18
	182452	183843	182452	183927	-84
NC_003234	5249	5647	5249	5899	-252
	29377	32058	29368	32058	9
	43589	44506	43589	44533	-27
	59695	62391	59695	62382	9
	63903	65237	64101	65237	-198
	140607	141656	140583	141656	24
	144659	146701	144356	146701	303
	159488	160249	159428	160249	60
	192936	193664	192936	193826	-162
NC_003235	41789	42469	41789	42529	-60
	43502	43852	43556	43852	-54
	46798	47277	46531	47277	267
	54676	55227	54631	55227	45
	55277	55600	55277	55630	-30
	88113	88727	88113	88751	-24
	97217	99577	97190	99577	27
	132689	133129	132689	133225	-96
	148652	149608	148652	149728	-120
	152295	153524	152334	153524	-39
	155874	156284	155874	156326	-42
	157395	158141	157395	158102	39
	172442	173053	172472	173053	-30
	186358	187062	186358	187119	-57
	187951	188595	187951	188574	21
	201217	203574	201187	203574	30
NC_003238	33406	34251	33406	34431	-180
	44964	46175	44964	46217	-42
	72461	73282	72461	73396	-114
	90361	91494	90361	91515	-21
	110630	111127	110594	111127	36
	145200	146183	145200	146213	-30
	161728	165012	161728	165000	12
	180711	182084	180756	182084	-45
NC_003236	88448	89332	88277	89332	171
	119361	121241	119361	121235	6
	176080	177144	176080	177141	3
	212265	212621	212265	212678	-57
NC_003237	47538	48281	47538	48302	-21
	131766	132179	131766	132215	-36
	140172	141452	140172	141326	126
	163891	164838	163891	164877	-39
	164927	166030	164927	166213	-183
	183117	186887	183117	187028	-141
	202663	203457	202663	203892	-435
	208331	208927	208331	208912	15
	253911	254306	253911	254327	-21

## Sheet: c)Falsely Predicted gene
chromosome accession number	correct CDS boundaries
NC_003230	550	1380

## Sheet: c)Mispredicted intron
chromosome accession number	correct CDS boundaries
NC_003235	107942	108926
	117812	118776
NC_003238	166840	167473
NC_003237	110822	111990
	133824	134392

[truncated: 1 more sheets: c) Unpredicted gene]
