# Supplementary material for: MicroAnnot: A Dedicated Workflow for Accurate Microsporidian Genome Annotation
Source: Preprints.org preprint supplement (doi:10.20944/preprints202310.1822.v1), 2023-10-30
Supplement: Supplementary file 2 [file Supplementary_Table_S2.xlsx]

## Sheet: a) corrected TIS
chromosome accession number	correct CDS boundaries		mispredicted CDS boundaries by microannot		CDS size difference
NC_014415	20715	21290
	21372	25118
	27162	28004					red :Bad TIS predicted by MicroAnnot
	38546	39160	38453	39160	93		green : good TIS predicted by MicroAnnot
	58129	58692	58129	58701	9		orange : warning for manual annotation
	81228	81659
	83036	83434
	92527	93102	92527	93147	45
	103620	103910
	113701	115560
	148341	150185
	148341	150185
NC_014416	4021	5016
	5144	6850
	8635	9297
	11828	12274
	38179	39660
	40724	42565
	61997	62543
	82818	83369
	123732	124241
	127127	127750
	144738	145609
	149957	151459
	151609	153444
	170691	171791
NC_014417	13615	15372
	29508	31085
	35554	36621
	40028	41212
	60392	60949
	68589	68903
	77957	78289
	78766	79590
	92505	93842
	121571	122041
	128585	129121
	170394	171041
NC_014418	3822	5003
	7401	8096
	8219	8788
	9792	10265
	13285	14417
	21382	21777
	41036	42106
	51641	52063	51641	52033	-30
	58925	60457
	68760	75857
	79657	80241	79657	80361	120
	89234	89959
	116164	121197
	127351	129522
	138903	139900
	161967	162983
	189254	190057
	193446	193640
NC_014419	11758	13680
	21922	23151
	27862	29103
	37428	38108
	48362	48907
	57106	57780	57106	57825	45
	81023	81793
	92180	92862
	101861	102649
	102761	102940
	102996	105119	102996	105143	24
	126084	128918
	152455	153414
	159618	161327
NC_014420	1334	3205
	38062	40269
	51308	51811
	51880	54669
	56617	56937
	75317	75601	GENE NOT PREDICTED
	75722	76278	75880	76278	-158
	85151	85645
	87615	90461
	103561	104133
	104196	104618
	105969	107624
	107692	109746
	113895	118319
	130007	130453
	130007	130453
	148186	148632
	155781	156329
	164005	164961
	184449	185513
	186178	187662
NC_014421	7211	8080
	20426	23107
	20426	23107
	58842	60011
	75564	76199
	78198	81515
	78198	81515
	109791	110393
	110751	110972
	131195	131455
	131564	132613
	134673	135047
	138088	138324
	145052	145459
	149888	150367
	153774	155621
	160484	160816
	161254	161952
	180581	181804
	195292	196090
NC_014422	11264	11977
	26817	27752
	34810	36039	34777	36039	33
	37645	37968
	41563	42252
	42702	43940
	49081	49967
	68979	69572
	70930	73116
	73172	73534
	76829	78130
	89743	90003
	97526	99325
	99411	99749
	122530	123804
	137850	138272
	139366	140115
	142905	144806
	148499	149635
	150991	151983	150991	152085	102
	173408	173949
	175906	176679	175906	176709	30
	181204	183549
	193164	193481
NC_014423	2147	2929
	6106	8124
	14690	15292
	15471	16928
	16990	17985
	18016	20406
	43564	44865
	46785	48128
	49877	50806
	55741	58665
	72708	73070
	73094	74380	73094	74551	171
	74503	74973
	79437	80063
	82728	83069
	89240	91093
	93985	94837
	96375	98363
	101943	102640
	113596	114210
	123022	124545
	133551	134183
	135213	135821
	157114	157764
	159490	160716
	184698	186008
	190818	191633
	205453	206151
	206247	206912
	208560	209690
	213061	213879
	218180	219385
	226117	229377
	231104	232129
NC_014424	41348	43225
	51385	52296
	75841	76725
	103579	105366
	131310	132797
	158506	161151
	162415	163062
	172826	173791
	192807	193262
	196062	197474
	221211	222398
	229121	230578
NC_014425	4369	5178
	57688	61151
	72467	72868
	72467	72868
	76402	76914
	90113	91720
	118135	118638
	130804	131511
	139427	140724
	141895	142362	GENE NOT PREDICTED
	143383	145353
	151756	152310
	165834	166796
	202780	204162
	219808	220878
	224177	224683
	227921	228319
	232450	233019

## Sheet: a) falsely predicted genes
chromosome accession number	boundaries		CDS predicted by Microannot
NC_014415	31104	31481	NO
NC_014417	34	279	NO			red :bad gene predicted by MicroAnnot
NC_014422	91699	92151	NO			green : Bad gene not predicted by MicroAnnot
	91267	91542	NO
	169534	170058	NO
NC_014424	66349	74292	NO
NC_014425	57688	59493	NO
	109180	109299	NO

## Sheet: a) intron prediction
chromosome accession number	correct CDS boundaries
NC_014415	81228	81659
NC_014416	61997	62543		red : intron not predicted by MicroAnnot
NC_014418	48904	49274		green : intron predicted by MicroAnnot
	160907	161197
	161318	161544
NC_014419	92180	92862
NC_014420	75722	76278
	148664	149014
NC_014421	39116	39442
	195292	196090
NC_014422	29178	29651
	90110	91087
	99912	100876
	122197	122472
	173408	173949
NC_014423	15471	16928
	93985	94837
	133551	134183
NC_014425	108399	108937

## Sheet: a) unpredicted gene
chromosome accession number	correct CDS boundaries		CDS size	CDS predicted by Microannot
NC_014415	41222	41488	267	YES
	45267	45488	222	NO		red : gene not predicted by MicroAnnot
	86498	86761	264	YES		green : gene predicted by MicroAnnot
	99143	99334	192	YES
	143653	143922	270	YES
NC_014416	15654	15929	276	YES
	17190	17369	180	YES
	31147	31404	258	YES
	37929	38117	189	YES
	56229	56441	213	YES
	74924	75175	252	YES
	82334	82765	432	YES
	90133	90369	237	YES
	93076	93333	258	YES
	156502	156684	183	YES
	170096	170266	171	YES
NC_014417	16357	16527	171	YES
	33412	33681	270	YES
	121223	121477	255	YES
	126543	126713	171	YES
	169000	169275	276	YES
NC_014418	6889	7053	165	YES
	9220	9387	168	YES
	9454	9732	279	YES
	39822	40055	234	YES
	48904	49274	371	YES
	58020	58277	258	YES
	78058	78330	273	YES
	121269	121442	174	YES
	161318	161544	227	NO
	171590	171880	291	YES
	171933	172130	198	YES
	173229	173426	198	YES
	190173	190406	234	YES
	193188	193274	87	YES
NC_014419	14231	14431	201	YES
	17145	17342	198	YES
	24800	24976	177	YES
	61599	61859	261	YES
	105175	105417	243	YES
	136700	136963	264	YES
	151206	151484	279	YES
	154308	154457	150	YES
	166265	166378	114	YES
	187283	187510	228	YES
NC_014420	7902	8138	237	YES
	8211	8411	201	YES
	10368	10592	225	YES
	13110	13313	204	YES
	27126	27230	105	YES
	44324	44587	264	YES
	47448	47810	363	YES
	66070	66318	249	NO
	67348	67614	267	YES
	70171	70455	285	YES
	121424	121609	186	YES
	141416	141637	222	YES
	148664	149014	351	YES
	169691	169915	225	NO
	172670	172888	219	YES
NC_014421	39116	39442	327	NO
	53579	53872	294	YES
	102189	102314	126	YES
	102352	102597	246	YES
	110447	110698	252	YES
	112105	112380	276	YES
	115005	115184	180	YES
	125766	125984	219	NO
	151750	152004	255	NO
	185658	185876	219	YES
	186404	186673	270	YES
	201864	202001	138	YES
NC_014422	6068	6247	180	YES
	19727	19912	186	YES
	26298	26498	201	YES
	41363	41518	156	YES
	50589	50795	207	YES
	60564	60704	141	YES
	115212	115442	231	YES
	122197	122472	276	YES
	141698	141970	273	YES
	144813	144995	183	YES
	183720	183944	225	YES
	154143	154301	159	YES
NC_014423	36603	36890	288	YES
	55461	55667	207	YES
	60676	60804	129	YES
	93704	93988	285	YES
	102702	102941	240	YES
	156971	157063	93	YES
	162402	163565	1164	YES
	173326	173523	198	YES
	180357	180506	150	YES
	194983	195114	132	YES
NC_014424	31496	31744	249	YES
	32614	32871	258	YES
	66120	66326	207	YES
	125973	126128	156	YES
	140987	141250	264	YES
	192245	192409	165	YES
NC_014425	6894	7055	162	YES
	12368	12580	213	YES
	47264	47449	186	YES
	49726	49920	195	YES
	55245	55415	171	YES
	55951	56211	261	YES
	98791	99000	210	YES
	109047	109283	237	YES
	123149	123403	255	YES
	128704	128877	174	YES
	156343	156600	258	YES
	184175	184567	393	YES
	188885	189091	207	YES
	218901	219161	261	YES
	233743	233952	210	YES

## Sheet: a) FS, SE & pseudogene
chromosome accession number	correct CDS boundaries
NC_014416	144738	145609
NC_014417	34	1693			red : Frameshift, sequence error or pseudogene not predicted by MicroAnnot
NC_014418	13285	14417			green : Frameshift, sequence error or pseudogene predicted by MicroAnnot
	138903	139900
NC_014421	114621	114933
NC_014422	49081	49967
	94277	95385
	168989	170058
NC_014423	101943	102640
NC_014424	66349	75781
NC_014425	57688	61151

## Sheet: b) add corrected TIS
chromosome accession number	correct CDS boundaries
NC_014415	4505	7087
NC_014415	8706	10085
NC_014417	154552	156417
NC_014419	13865	14173
NC_014419	152455	153414
NC_014420	27361	28068
NC_014420	51308	51811
NC_014422	68979	69572
NC_014422	122530	123804
NC_014422	137439	137843
NC_014423	82728	83069
NC_014423	129205	130404
NC_014423	176380	177819
NC_014424	125973	126128
NC_014424	172826	173791
NC_014425	51134	52912
NC_014425	106844	108268
NC_014425	168893	169564

## Sheet: b) add FS, SE & pseudogene
chromosome accession number	CDS boundaries		Gene type
NC_014417	66296	66562	Pseudogene

## Sheet: c) Falsely predicted TIS
chromosome accession number	correct CDS boundaries		mispredicted CDS boundaries by MicroAnnot		CDS size difference
NC_014415	63937	64860	63874	64860	63
NC_014416	52689	54230	52689	54344	114
NC_014418	5370	6836	5370	6839	two consecutive AUG : 3
	68006	68716	68006	68713	two consecutive AUG -3
	100690	101259	100693	101259	two consecutive AUG -3
	111993	112499	111993	112613	114
	156077	156961	156077	156952	-9
NC_014419	17574	19511	17550	19511	24
	44420	45019	44420	45097	78
	69076	79380	69073	79380	two consecutive AUG 3
NC_014420	144202	145140	144208	145140	-6
	197839	198217	197884	198217	-45
NC_014421	139058	140038	139058	140029	-9
	201341	201754	201365	201754	-9
NC_014422	39846	41294	39846	41288	-6
	45755	46597	45788	46597	-33
	60564	60704	60573	60704	-9
	63721	64581	63718	64581	two consecutive AUG 3
	184094	184495	184091	184495	two consecutive AUG 3
NC_014423	32150	32968	32150	33184	216
	39830	40864	39830	40861	two consecutive AUG -3
	111805	112431	111808	112431	two consecutive AUG -3
	232627	233388	232627	233397	9
NC_014424	34825	36369	34825	36363	-6
	87065	88165	87065	88135	-30
	108799	110868	108997	110868	-198
	181095	182582	181095	182579	two consecutive AUG -3
	204063	204899	204063	204896	two consecutive AUG -3
	205019	205630	205019	205702	72
NC_014425	28562	28945	28574	28945	-12
	109047	109283	109047	109280	two consecutive AUG-3
	136483	138309	136483	138306	two consecutive AUG-3

## Sheet: c) Unpredicted gene
chromosome accession number	correct CDS boundaries		CDS size
NC_014416	93227	93730	504
NC_014420	75317	75601	285
NC_014425	49726	49920	195
	194453	194872	420

## Sheet: c) Mispredicted TE
chromosome accession number	correct CDS boundaries
NC_014425	141895	142362
