# Supplementary material for: MicroAnnot: A Dedicated Workflow for Accurate Microsporidian Genome Annotation
Source: Preprints.org preprint supplement (doi:10.20944/preprints202310.1822.v1), 2023-10-30
Supplement: Supplementary file 3 [file Supplementary_Table_S3.xlsx]

## Sheet: a) corrected TIS
chromosome accession number	correct CDS bondaries		mispredicted CDS boundaries by microannot		CDS size difference	Comment
ACOL01000001	5477	6700
	15829	16488
	30904	31437	30943	31437	39
	38713	39024						red :Bad TIS predicted by MicroAnnot
ACOL01000002	2733	3778	2733	3617	161	FS NOT PREDICTED		green : good TIS predicted by MicroAnnot
	5112	6374	5079	6374	-33			orange : warning for manual annotation
	42928	43302
	49622	50170
	55087	55455
ACOL01000003	5803	6060
	17370	17741
	20175	21179
	38669	39358
	43382	44554
ACOL01000004	2570	2818
	18821	19489
	22175	22777
ACOL01000005	8146	9867
	14040	14396
	22847	23200
ACOL01000006	8510	8809
	13014	13358	13071	13358	57
	32029	32613	31975	32613	-54
ACOL01000007	13193	13759
	26558	29150
ACOL01000008	10363	11064
	18881	19165
	27411	27758	GENE NOT PREDICTED
ACOL01000009	18586	19521	18586	19542	-21
ACOL01000010	8743	9240	8743	9267	-27
	17586	18173
	18470	19432	18446	19432	-24
	20434	20706
ACOL01000011	14775	15203
ACOL01000012	25040	25375
ACOL01000013	3365	4027
	5308	7524
ACOL01000014	1944	2762	1938	2762	-18
	2948	3652
	7048	8760
	9009	10526	9009	10568	-42
	14249	22024
ACOL01000015	21125	21403
ACOL01000016	143	1739
	3101	3448
	3523	3876
	12058	12996
	17797	18318	17797	18348	-30
	21245	21886
ACOL01000017	16498	17724
ACOL01000018	21701	22036
ACOL01000019	6457	6921
	18599	19108
ACOL01000020	4643	5128
	5951	7231
	18977	19183
ACOL01000021	6414	8462
	13086	13976
ACOL01000022	10614	10994	10614	11012	-18
	14547	17060	14547	17087	-27
	17953	18786
ACOL01000024	3238	4402
	4836	5189
	18379	18684
ACOL01000025	6089	7360	6029	7360	-60
	7371	9735	7371	8750	985
	16868	17497	16769	17497	-99
ACOL01000026	6216	6446
ACOL01000027	5194	5499
	16059	18158	16059	18206	-48
ACOL01000030	3242	4168
	18546	19481	18546	19574	-93
ACOL01000031	4481	5386
	5613	6095
	15175	15621	GENE NOT PREDICTED
ACOL01000033	16073	16399
ACOL01000034	526	948
	3110	4336
	4400	5290
	15335	15643
ACOL01000036	4979	6475
	12856	13500	12808	13500	-48
	16483	17985
ACOL01000038	5461	6388
	13221	13469
	14178	15122
	15157	17010
ACOL01000039	14133	14453
ACOL01000040	5623	6183
	6233	7156
ACOL01000043	218	916
	2278	2625
ACOL01000044	4836	6041
	11836	12642
	15155	15823
ACOL01000045	3239	6514
	13883	15046
ACOL01000046	1629	2483
	2527	3387
	8251	10562
	15629	16894
ACOL01000047	54	449	27	449	-27
ACOL01000048	5164	5664
	9092	10387
ACOL01000049	7803	10130
	15328	16467
ACOL01000051	6033	6533
	9580	10536
ACOL01000053	7480	7755
ACOL01000054	4175	5134
	6819	7610
	10174	10788
ACOL01000055	3179	3700
	10324	10677
ACOL01000058	5371	6288
ACOL01000060	10772	11380
	13449	14084	13449	14165	-81
ACOL01000061	3329	4855
	4890	5783	4878	5783	-12
ACOL01000063	1111	1520	GENE NOT PREDICTED
	2101	4149	2101	4155	-6
	5957	6709
ACOL01000064	183	1466	120	1466	-63
	6833	7639
ACOL01000065	768	1745
	1780	3443
ACOL01000066	3634	4572
	11985	12455	11967	12455	-18
	12528	12731
ACOL01000067	4811	5261	4811	5149	112	FS NOT PREDICTED
	6772	7080
	14215	14739
ACOL01000068	1518	2531
	14090	14380
ACOL01000069	9534	10007
	11265	11528
ACOL01000072	10372	12717
ACOL01000075	7879	8196
ACOL01000076	3245	3797	GENE NOT PREDICTED
	9173	12505
ACOL01000077	2047	3498
	6274	7002
	11408	12305	11574	12305	166	FS NOT PREDICTED
ACOL01000078	8427	8987	8427	8996	-9
ACOL01000081	1230	3869	1230	3881	-12
ACOL01000082	9577	9891
ACOL01000085	1191	2087
ACOL01000087	4094	5518	4094	5539	-21
ACOL01000089	1317	2111	1317	2123	-12
ACOL01000091	3252	5495	3252	5597	-102
	6137	6766
ACOL01000092	3269	4546
ACOL01000095	1955	2161
	2742	4118	2697	4118	-45
	4866	5090
	5170	6144
ACOL01000096	3700	4065
ACOL01000097	8067	9866
ACOL01000100	4972	8323	5234	8323	262	FS NOT PREDICTED
ACOL01000101	3811	4098
ACOL01000102	5399	5683
ACOL01000103	8557	10002
ACOL01000104	2278	3614	2278	3147	467
	7311	7865	7311	7898	-33
ACOL01000105	5159	5644	5159	5689	-45
	9818	10129
	10158	10538
ACOL01000106	1878	3035
	8600	8851
ACOL01000111	1477	1728
	6641	8254
ACOL01000112	2962	3591
ACOL01000113	991	2484
ACOL01000115	2856	3116
ACOL01000116	9092	9622
ACOL01000117	5522	6961
ACOL01000118	7896	8552
ACOL01000119	8024	8362
ACOL01000123	4813	6480	4795	6480	-18
ACOL01000124	6495	7025
	7844	9078	8044	9078	200	FS NOT PREDICTED
ACOL01000125	3622	5232
ACOL01000126	1402	1926
	1945	2925
	7124	7987
	9144	9632
ACOL01000127	5479	5754
ACOL01000128	1160	2179	1160	2215	-36
ACOL01000131	2219	2719	2219	2752	-33
	7013	9311
ACOL01000132	1047	1349
ACOL01000138	33	1317	178	1317	145	FS NOT PREDICTED
ACOL01000139	4070	4339
ACOL01000142	484	930	325	930	-159
	1036	2133
ACOL01000144	477	1364
	1389	2822
ACOL01000148	512	2138
	3429	3719
ACOL01000153	2604	4016
ACOL01000155	3646	3975
	4282	5487
ACOL01000159	199	1525
ACOL01000160	3838	4140
ACOL01000161	1553	4018
	5072	5536
	5566	6435
ACOL01000162	6701	7597
ACOL01000163	4104	4733
ACOL01000172	6459	6818
ACOL01000173	6437	7618
ACOL01000174	351	992
ACOL01000177	4946	5224
ACOL01000180	3441	4547
ACOL01000184	4378	4716
ACOL01000185	594	2144
	2362	2997
ACOL01000187	103	387
	3089	3451
ACOL01000193	2469	4403
ACOL01000197	173	961	173	1000	-39
	2628	3905	2628	3998	-93
ACOL01000198	1800	2117
	3704	5589
ACOL01000199	6436	6723
ACOL01000203	3050	4479
ACOL01000206	4577	5194
ACOL01000209	2404	4071
ACOL01000211	5345	6268
ACOL01000216	4553	5767	4541	5767	-12
ACOL01000223	262	537
ACOL01000226	5026	5691
ACOL01000227	1842	2207	GENE NOT PREDICTED
ACOL01000230	3350	3706
ACOL01000232	4329	4955	4290	4955	-39
ACOL01000236	1652	2137
	2416	3195	2416	3210	-15
	4066	4380	3982	4380	-84
ACOL01000239	3154	3495
ACOL01000248	3846	4124
ACOL01000252	453	5483
ACOL01000262	4041	5357
ACOL01000265	469	744
ACOL01000266	1390	3168
ACOL01000269	4056	4406
ACOL01000274	3411	3698
ACOL01000277	3271	3582
ACOL01000294	703	1038
ACOL01000295	1755	2444	1755	2366	78
	3724	4761
ACOL01000296	934	1685	GENE NOT PREDICTED
ACOL01000304	3960	4588	4001	4588	41	FS NOT PREDICTED
ACOL01000307	638	1882
ACOL01000310	2853	3777	2853	3422	355	FS NOT PREDICTED
ACOL01000323	123	425
	2484	3283	2840	3283	356	FS NOT PREDICTED
ACOL01000339	3472	4035
ACOL01000348	3003	3284
ACOL01000372	1805	3514
ACOL01000393	628	2014	628	1728	286	FS NOT PREDICTED
ACOL01000396	1365	3197
ACOL01000426	2230	3144	2194	3144	-36
ACOL01000430	2338	3136
ACOL01000432	1662	2012
ACOL01000434	2192	2866
ACOL01000436	692	1279
ACOL01000440	786	1112
ACOL01000446	689	1368
	1426	1668
ACOL01000466	1	254	GENE NOT PREDICTED
ACOL01000478	594	986
ACOL01000479	822	1100
ACOL01000481	605	862
ACOL01000484	1568	2554
ACOL01000494	46	621	46	654	-33
ACOL01000509	628	924
ACOL01000522	2091	2498
ACOL01000526	611	1871	611	1588	283	FS NOT PREDICTED
ACOL01000546	1	573
ACOL01000567	697	2259
ACOL01000578	220	577
ACOL01000597	387	2240	369	2240	-18
ACOL01000600	1698	1925
ACOL01000647	1051	1452
ACOL01000658	156	425
ACOL01000667	792	1748
ACOL01000688	496	1744	496	1386	358	FS NOT PREDICTED
ACOL01000732	861	1286	861	1334	-48
ACOL01000766	452	1363
ACOL01000771	406	1302	406	1428	-126
ACOL01000777	424	846	424	867	-21
ACOL01000796	501	1132	683	1132	182	FS NOT PREDICTED
ACOL01000862	322	600
ACOL01000863	744	1406
ACOL01000972	234	575	GENE NOT PREDICTED
ACOL01000985	381	1217	372	1218	-10
ACOL01001038	589	864
ACOL01001133	625	915
ACOL01001195	521	826	GENE NOT PREDICTED
ACOL01001433	2	679
ACOL01001455	1	595
ACOL01001683	217	519
ACOL01001742	221	658	221	808	-150
ACOL01002190	100	405
ACOL01002549	1	380
ACOL01003398	369	599
ACOL01003831	1	226
ACOL01004315	1	205	GENE NOT PREDICTED

## Sheet: a) falsely predicted genes
chromosome accession number	CDS boundaries
ACOL01000002	32693	33106
ACOL01000003	43659	44387
ACOL01000004	38635	38937		red :bad gene predicted by MicroAnnot
ACOL01000008	14927	15283		green : Bad gene not predicted by MicroAnnot
ACOL01000010	27533	27850		orange : warning for manual annotation
ACOL01000013	12012	12380
ACOL01000020	2779	3159
	19584	19934
	20481	20825
ACOL01000022	18785	19141
ACOL01000023	9532	9894
ACOL01000025	7371	8726
ACOL01000029	6280	6603
ACOL01000037	6186	6557
ACOL01000049	9691	10164
ACOL01000063	5896	6372
ACOL01000072	7681	8046
ACOL01000095	5555	6244
ACOL01000096	7336	7641
ACOL01000105	6671	7045
ACOL01000110	3588	3905
ACOL01000111	6688	7011
ACOL01000121	1360	2973
ACOL01000123	8388	8729
ACOL01000130	6630	7262
ACOL01000140	1235	1672
ACOL01000150	8008	8442
ACOL01000161	690	1148
	6335	6661
ACOL01000163	7158	7520
ACOL01000197	5127	5498
ACOL01000202	4453	4857
ACOL01000228	4550	4903
ACOL01000238	297	692
ACOL01000241	4141	4512
ACOL01000243	4404	4589
ACOL01000271	872	1219
ACOL01000308	3910	4236
ACOL01000314	2219	2752
	3017	3307
	3287	3577
ACOL01000322	1250	1705
ACOL01000325	1923	2228
ACOL01000330	2458	2775
ACOL01000333	3085	3426
ACOL01000364	732	1130
ACOL01000413	3042	3308
ACOL01000459	143	535
ACOL01000507	549	1127
ACOL01000560	70	387
ACOL01000571	1397	1846
ACOL01000602	203	541
ACOL01000631	124	612
ACOL01000687	378	665
ACOL01000722	316	699
ACOL01000738	1377	1688
ACOL01000766	1092	1436
ACOL01000774	49	486
ACOL01000779	393	818
ACOL01000918	231	635
ACOL01001085	357	872
ACOL01001123	684	1091
ACOL01001153	41	463
ACOL01001436	15	344
ACOL01001567	160	420
ACOL01001579	367	681
ACOL01001829	293	709
ACOL01001878	273	593
ACOL01001910	336	740
ACOL01002230	165	482
ACOL01002410	242	463
ACOL01002496	8	289
ACOL01002850	127	522
ACOL01003514	219	515
ACOL01004330	43	462
ACOL01004906	141	509

## Sheet: a) predicted intron
chromosome accession number	correct CDS boundaries
ACOL01000068	13792	14050
ACOL01000115	2856	3116		red : intron not predicted
ACOL01000446	689	1368		green : intron predicted
ACOL01002877	453	635

## Sheet: a) unpredicted gene
Chromosome accession number	correct CDS boundaries
ACOL01000001	16537	16875
	31974	32264
	33812	34099		red : gene not predicted by MicroAnnot
	35382	35585		green : gene predicted by MicroAnnot
	56352	56585
	56604	56903
ACOL01000002	19972	20214
ACOL01000003	16677	16955
	22531	22764
	36329	36721
ACOL01000004	23021	23314
ACOL01000005	3820	4152
ACOL01000006	8828	9049
	15182	15448
	31649	31855
	32873	33127
ACOL01000007	11706	11966
ACOL01000008	16509	16718
	23568	23804
ACOL01000009	20166	20465
ACOL01000010	14456	14764
ACOL01000011	3910	4275
	13506	13730
ACOL01000013	4051	4431
	7584	7859
ACOL01000014	22078	22350
ACOL01000015	325	693
ACOL01000016	1768	2031
	11216	11437
	21965	22252
ACOL01000018	7884	8171
	11718	11981
ACOL01000019	1524	1775
	1799	2038
	7441	7683
	11173	11433
ACOL01000020	2721	3098
	10433	10693
ACOL01000022	8087	8356
ACOL01000023	4232	4501
	9273	9539
	21114	21337
ACOL01000024	18124	18333
ACOL01000025	5707	6045
ACOL01000026	1512	1883
ACOL01000028	3517	3855
	3924	4157
	4730	4933
ACOL01000030	12309	12503
ACOL01000031	14329	14532
ACOL01000032	17463	17735
ACOL01000034	9444	9689
	16889	17534
ACOL01000036	3288	3599
	17994	18188
ACOL01000037	6098	6367
ACOL01000038	1	553
	13476	13697
ACOL01000039	2475	2825
ACOL01000040	3099	3323
	4550	4816
	4820	5086
ACOL01000044	4192	4389
	4534	4800
	8832	9080
ACOL01000045	9206	9529
	11139	11468
ACOL01000047	3535	3729
	12416	12607
ACOL01000048	10416	10631
ACOL01000050	7369	7572
	9126	9377
	14494	14745
ACOL01000051	1816	2172
	13140	13532
ACOL01000053	1729	1977
ACOL01000054	13876	14079
ACOL01000055	7964	8230
ACOL01000060	2617	2859
	7514	7768
	7778	8116
	10317	10478
ACOL01000063	13768	14112
ACOL01000067	2561	2746
	5800	6048
ACOL01000068	13792	14050
ACOL01000069	5587	5913
	9242	9469
ACOL01000070	6105	6338
	8472	8741
ACOL01000077	6019	6252
ACOL01000079	978	1232
ACOL01000081	5709	5990
ACOL01000083	1895	2272
	11549	11868
ACOL01000086	1242	1529
	3449	3607
ACOL01000091	2753	3028
	9843	10190
ACOL01000092	8239	8535
ACOL01000108	6399	6668
	6462	6668
ACOL01000109	996	1259
	5198	5446
ACOL01000114	8048	8278
ACOL01000117	9638	9925
ACOL01000119	8477	8668
ACOL01000124	7202	7438
	7452	7676
	7844	8056
	9219	9458
	9442	9642
ACOL01000128	6472	6666
ACOL01000139	1	816
ACOL01000145	4223	4501
	7319	7570
ACOL01000149	507	827
ACOL01000150	5969	6184
ACOL01000152	274	408
ACOL01000154	4564	4944
ACOL01000155	7575	7934
ACOL01000158	1195	1416
ACOL01000161	776	1192
ACOL01000163	7201	7524
ACOL01000166	747	1040
ACOL01000174	2406	2744
ACOL01000183	6427	6808
ACOL01000184	2727	3029
	3741	4013
	4960	5458
ACOL01000186	4892	5098
	5661	5999
ACOL01000187	472	813
ACOL01000197	5158	6498
ACOL01000206	2	256
ACOL01000214	4593	4850
ACOL01000230	51	344
ACOL01000236	3536	3706
ACOL01000248	746	1072
ACOL01000249	1232	1486
ACOL01000250	1539	1874
ACOL01000260	1446	1775
ACOL01000263	459	812
ACOL01000277	887	1249
	3602	3817
	4834	5193
ACOL01000285	4538	5036
ACOL01000286	148	450
ACOL01000291	1	1015
ACOL01000294	1738	2043
	3634	3837
ACOL01000302	4105	4398
ACOL01000308	3935	4663
ACOL01000335	3628	4132
ACOL01000344	3068	3415
ACOL01000346	1810	2037
ACOL01000348	1205	1432
ACOL01000362	832	1173
ACOL01000380	412	657
ACOL01000388	186	515
	1861	2145
ACOL01000390	2568	2810
ACOL01000392	3178	3429
ACOL01000393	268	627
ACOL01000396	202	516
	868	1146
ACOL01000406	3022	3213
ACOL01000418	2735	3245
ACOL01000423	2903	3190
ACOL01000458	1530	1808
ACOL01000463	1799	2936
ACOL01000467	2005	2217
	2508	2723
ACOL01000477	2185	2502
ACOL01000480	428	736
	1531	1776
ACOL01000488	2417	2677
ACOL01000495	1988	2418
ACOL01000522	1827	2063
ACOL01000543	926	1246
ACOL01000548	2165	2494
ACOL01000549	2092	2490
ACOL01000552	76	213
ACOL01000590	1	553
ACOL01000612	1	401
ACOL01000625	1376	1612
	1636	1905
ACOL01000642	1522	1851
ACOL01000687	1	1246
ACOL01000718	576	809
ACOL01000736	1519	1704
ACOL01000779	1299	1584
ACOL01000787	821	1156
ACOL01000807	221	1519
ACOL01000851	1	1174
ACOL01000950	1	187
ACOL01000988	111	407
	497	664
ACOL01001005	1015	1203
ACOL01001067	138	392
ACOL01001071	930	1136
ACOL01001076	1	601
ACOL01001080	817	1038
ACOL01001082	1	189
ACOL01001111	508	804
ACOL01001142	69	380
ACOL01001143	136	318
ACOL01001160	586	840
ACOL01001192	25	228
ACOL01001265	778	989
ACOL01001398	385	567
ACOL01001408	171	365
ACOL01001424	683	865
ACOL01001430	191	911
ACOL01001441	198	566
ACOL01001474	1	304
ACOL01001514	1	207
ACOL01001534	354	560
ACOL01001554	27	392
ACOL01001623	523	845
ACOL01001625	488	784
ACOL01001655	430	645
ACOL01001723	16	213
ACOL01001835	1	180
ACOL01001845	364	570
ACOL01001879	1	645
ACOL01001904	83	283
ACOL01001915	1	320
ACOL01001938	264	566
ACOL01001978	1	404
ACOL01001990	519	750
ACOL01002008	517	747
ACOL01002018	170	367
ACOL01002037	374	679
ACOL01002170	1	426
ACOL01002240	42	248
ACOL01002285	505	701
ACOL01002319	1	696
ACOL01002372	1	186
ACOL01002406	84	687
ACOL01002521	173	671
ACOL01002537	24	290
ACOL01002567	1	385
ACOL01002600	367	663
ACOL01002652	1	411
ACOL01002657	452	656
ACOL01002721	1	278
ACOL01002732	57	425
ACOL01002753	1	484
ACOL01002757	55	258
ACOL01002799	1	214
ACOL01002830	1	238
ACOL01002847	17	637
ACOL01002859	1	635
ACOL01002877	453	635
ACOL01002923	351	590
ACOL01003069	31	234
ACOL01003285	376	573
ACOL01003339	251	466
ACOL01003400	398	599
ACOL01003499	349	592
ACOL01003501	43	300
ACOL01003541	322	590
ACOL01003698	376	582
ACOL01003743	378	580
ACOL01003756	345	579
ACOL01003882	1	287
ACOL01003882	374	573
ACOL01003900	220	465
ACOL01004003	1	330
ACOL01004108	86	319
ACOL01004181	1	216
ACOL01004234	36	347
ACOL01004254	202	552
ACOL01004310	170	551
ACOL01004401	342	546
ACOL01004435	309	544
ACOL01004452	189	386
ACOL01004524	1	197
ACOL01004567	163	402
ACOL01004777	1	260
ACOL01004798	1	342
ACOL01005010	77	364
ACOL01005030	26	421
ACOL01005041	160	517
ACOL01005086	1	443
ACOL01005319	103	294
ACOL01005325	226	505
ACOL01005352	1	225
ACOL01005399	87	284
ACOL01005448	22	399
ACOL01005457	1	373

## Sheet: a) FS, SE & pseudogene
chromosome accession number	correct CDS boundaries		COMMENT
ACOL01000001	7542	11122
	45138	46810
ACOL01000002	2733	3778
ACOL01000003	29730	30792				red : Frameshift, sequence error or pseudogene not predicted by MicroAnnot
	36793	37370				green : Frameshift, sequence error or pseudogene predicted by MicroAnnot
ACOL01000004	10731	11842				orange : Frameshift, sequence error or pseudogene not predicted by MicroAnnot but warning due to large sequence between start of ORF and start of CDS
	24821	25859
	31973	38292
ACOL01000005	4666	7156
ACOL01000006	23334	24109
	26480	28869
ACOL01000007	13817	16805
	26558	29150
ACOL01000008	6950	8496
ACOL01000009	8653	12785
ACOL01000010	9287	9999
ACOL01000011	1358	2831
ACOL01000012	7509	8848
	22764	24793
ACOL01000013	821	1950
	13659	14172
ACOL01000015	15649	17816
ACOL01000016	143	1739
	14898	17512
ACOL01000020	19693	20825
ACOL01000021	5574	6349
ACOL01000023	9532	10874
ACOL01000024	3238	4402
	5208	8005
	8677	10424
ACOL01000025	7371	9735
ACOL01000027	6937	8614
ACOL01000030	5594	7683
	8369	9366
	9535	11393
ACOL01000031	14524	15004	GENE NOT PREDICTED
	15112	17252
	18235	18605	GENE NOT PREDICTED
ACOL01000034	16889	17534
ACOL01000035	2137	4511
ACOL01000038	5461	6388
ACOL01000040	7701	9105
ACOL01000046	8251	10562
ACOL01000047	15361	17004
ACOL01000048	11818	13439
ACOL01000049	6405	7377
ACOL01000050	12445	14350
ACOL01000051	13589	15052
ACOL01000053	11090	11598
ACOL01000056	9450	12481
ACOL01000058	13369	15460
ACOL01000062	11682	13695
ACOL01000063	1111	1520	GENE NOT PREDICTED
ACOL01000065	1780	3443
ACOL01000066	980	2358
ACOL01000067	1121	2037
	4811	5261
ACOL01000070	1596	2670
ACOL01000071	9249	13239
ACOL01000075	4109	4691
ACOL01000076	3245	3797	GENE NOT PREDICTED
ACOL01000077	11408	12305
ACOL01000082	8186	9588
ACOL01000086	3848	4542
ACOL01000090	392	1647
ACOL01000093	5821	8567
ACOL01000094	885	2653
ACOL01000095	8438	9524
ACOL01000099	25	1426
ACOL01000099	3215	3996
ACOL01000100	4972	8323
ACOL01000104	2278	3614
ACOL01000107	930	2079
ACOL01000108	4768	5810
ACOL01000117	827	2021
	7774	8861
ACOL01000121	1360	3919
ACOL01000124	3825	6033
	7844	9078
ACOL01000130	5587	7262
ACOL01000131	7013	9311
ACOL01000133	6246	7903
ACOL01000138	33	1317
ACOL01000141	951	1524
ACOL01000143	1931	2543
	2675	4121
ACOL01000145	2985	4201
ACOL01000148	512	2138
ACOL01000150	6317	8442
ACOL01000159	199	1525
ACOL01000173	946	6098
ACOL01000178	6361	6937
ACOL01000183	6427	6808	GENE NOT PREDICTED
ACOL01000184	4960	5458	GENE NOT PREDICTED
ACOL01000198	3704	5589
ACOL01000203	3050	4479
ACOL01000248	4456	5425
ACOL01000296	934	1685	GENE NOT PREDICTED
ACOL01000304	3960	4588
ACOL01000310	2853	3777
ACOL01000323	2484	3283
ACOL01000341	2794	3743
ACOL01000352	3367	3883	GENE NOT PREDICTED
ACOL01000353	3432	3882	GENE NOT PREDICTED
ACOL01000382	216	2895
ACOL01000393	628	2014
ACOL01000423	1	1849
ACOL01000446	689	1368
ACOL01000467	1	1831
ACOL01000495	1988	2418	GENE NOT PREDICTED
ACOL01000504	1	304	GENE NOT PREDICTED
ACOL01000526	611	1871
ACOL01000578	220	577
	966	1591
ACOL01000631	124	1751
ACOL01000688	496	1744
ACOL01000776	894	1533
ACOL01000796	501	1132
ACOL01000863	744	1406
ACOL01000868	492	1396
ACOL01003225	1	572

## Sheet: b) add corrected TIS
chromosome accession number	correct CDS boundaries
ACOL01000006	12473	12880
ACOL01000015	4159	5061
ACOL01000025	16769	17497
ACOL01000075	5440	6840
ACOL01000142	325	930
ACOL01000148	31	420
ACOL01000197	173	1000
ACOL01000197	2628	3998
ACOL01000216	4541	5767
ACOL01000283	2347	2763
ACOL01000372	1805	3553
ACOL01000597	369	2240
ACOL01001402	1	925
ACOL01002403	246	686
ACOL01004310	1	551

## Sheet: b) add falsely predicted gene
chromosome accession number	CDS boundaries	CDS boundaries
ACOL01000021	13846	14166
ACOL01000233	77	460
ACOL01000251	2085	2489

## Sheet: b) add predicted intron
Chromosome accession number	correct CDS boundaries
ACOL01000656	40	426

## Sheet: b) add unpredicted gene
Chromosome accession number	correct CDS boundaries		CDS size
ACOL01000001	33438	33755	318
ACOL01000002	35125	35295	171
	51706	51813	108
ACOL01000005	26890	27123	234
ACOL01000006	24151	24294	144
ACOL01000007	29647	29805	159
ACOL01000009	23271	23465	195
ACOL01000010	15919	16257	339
ACOL01000014	271	429	159
	10540	10731	192
	25921	26276	356
ACOL01000024	137	385	249
ACOL01000025	14966	15091	126
ACOL01000029	9568	9690	123
	17960	18112	153
ACOL01000032	14412	14804	393
ACOL01000033	9834	10043	210
	13387	13593	207
ACOL01000034	5331	5492	162
ACOL01000034	18075	18242	168
ACOL01000043	13837	14004	168
ACOL01000047	15028	15288	261
ACOL01000049	14161	14262	102
ACOL01000053	9439	9597	159
ACOL01000054	11044	11163	120
ACOL01000055	11531	11731	201
ACOL01000058	11072	11239	168
ACOL01000064	11391	11492	102
ACOL01000068	13482	13769	288
ACOL01000076	643	948	306
ACOL01000079	2088	2264	177
ACOL01000082	11690	11860	171
ACOL01000083	10320	10454	135
ACOL01000084	9407	9730	324
ACOL01000085	2786	2956	171
ACOL01000090	5101	5280	180
ACOL01000095	6188	6328	141
	8154	8300	147
ACOL01000101	1504	1668	165
ACOL01000109	7723	7857	135
ACOL01000114	1894	2049	156
ACOL01000115	3811	3981	171
	4080	4208	129
ACOL01000130	6885	7262	378
ACOL01000140	8534	8884	351
ACOL01000144	313	474	162
ACOL01000145	5218	5364	147
ACOL01000159	1208	1525	318
ACOL01000160	668	823	156
ACOL01000164	5300	5551	252
ACOL01000166	1304	1462	159
ACOL01000171	2529	2735	207
ACOL01000180	1392	1544	153
	3028	3153	126
	3152	3289	138
ACOL01000184	1397	1564	168
ACOL01000185	3095	3418	324
ACOL01000196	65	304	240
	367	576	210
ACOL01000205	224	364	141
ACOL01000208	2660	3028	369
ACOL01000213	389	1021	633
ACOL01000214	4861	5124	264
ACOL01000217	2933	3553	621
ACOL01000218	24	173	150
ACOL01000238	297	692	396
ACOL01000240	5360	5581	222
ACOL01000241	4159	4512	354
ACOL01000242	4633	4803	171
ACOL01000246	2413	2727	315
ACOL01000248	4766	5425	660
ACOL01000251	4040	4273	234
ACOL01000252	61	384	324
ACOL01000263	1	395	395
ACOL01000265	163	333	171
ACOL01000269	3582	3926	345
ACOL01000291	2697	2915	219
ACOL01000294	4225	4410	186
ACOL01000303	650	1006	357
ACOL01000322	1250	1612	363
ACOL01000342	787	921	135
ACOL01000343	1	78	78
ACOL01000344	1	276	276
	734	1018	285
ACOL01000356	2636	3493	858
ACOL01000364	732	1082	351
	3648	3731	84
ACOL01000375	2832	2993	162
ACOL01000380	294	413	120
ACOL01000388	666	764	99
ACOL01000393	3360	3488	129
ACOL01000402	1	3373	3373
ACOL01000413	3042	3281	240
ACOL01000429	681	1046	366
ACOL01000457	1707	1862	156
ACOL01000461	2868	2939	72
ACOL01000467	1022	1831	810
ACOL01000484	129	302	174
ACOL01000494	2006	2203	198
ACOL01000495	15	98	84
ACOL01000500	1	445	445
ACOL01000507	196	531	336
	786	1127	342
ACOL01000511	2477	2650	174
ACOL01000516	1270	1539	270
ACOL01000535	1930	2082	153
ACOL01000546	1881	2147	267
ACOL01000557	1997	2107	111
ACOL01000567	682	1041	360
ACOL01000622	494	670	177
ACOL01000645	1894	1984	91
ACOL01000656	67	426	360
ACOL01000665	1449	1929	481
ACOL01000677	44	241	198
ACOL01000718	1639	1776	138
ACOL01000725	1456	1653	198
ACOL01000733	903	1208	306
ACOL01000741	1	337	337
ACOL01000746	1423	1563	141
ACOL01000758	1487	1633	147
ACOL01000780	127	330	204
ACOL01000835	546	707	162
ACOL01000836	1277	1447	171
ACOL01000869	1083	1394	312
ACOL01000877	606	731	126
ACOL01000891	1260	1369	110
ACOL01000931	1122	1291	170
ACOL01000960	1	335	335
ACOL01000999	1	180	180
ACOL01001059	1	85	85
ACOL01001079	237	620	384
ACOL01001100	696	1116	421
ACOL01001123	684	1091	408
ACOL01001265	1	104	104
ACOL01001266	1	141	141
ACOL01001306	1	62	62
ACOL01001365	1	413	413
	696	941	246
ACOL01001374	792	937	146
ACOL01001451	472	633	162
ACOL01001459	14	706	693
ACOL01001460	1	104	104
ACOL01001479	828	887	60
ACOL01001494	1	455	455
ACOL01001516	1	876	876
ACOL01001530	1	243	243
ACOL01001538	113	415	303
ACOL01001579	367	681	315
ACOL01001584	725	856	132
ACOL01001615	655	846	192
ACOL01001622	1	845	845
ACOL01001631	1	844	844
ACOL01001657	261	392	132
ACOL01001677	81	212	132
ACOL01001683	658	813	156
ACOL01001714	598	816	219
ACOL01001750	604	806	203
ACOL01001761	87	801	715
ACOL01001769	743	801	59
ACOL01001821	1	787	787
ACOL01001870	167	535	369
ACOL01001884	1	129	129
ACOL01001895	236	772	537
ACOL01001921	515	652	138
ACOL01001974	1	319	319
ACOL01001975	690	752	63
ACOL01001977	690	752	63
ACOL01001978	691	752	62
ACOL01002025	260	379	120
ACOL01002092	390	530	141
ACOL01002161	390	719	330
ACOL01002230	165	440	276
ACOL01002239	517	657	141
ACOL01002244	1	213	213
ACOL01002304	465	698	234
ACOL01002318	370	696	327
ACOL01002323	426	695	270
ACOL01002324	1	260	260
ACOL01002326	390	697	308
ACOL01002337	619	693	75
ACOL01002348	121	270	150
ACOL01002387	267	590	324
ACOL01002424	1	684	684
ACOL01002428	43	180	138
ACOL01002440	431	682	252
ACOL01002444	465	681	217
ACOL01002461	519	677	159
ACOL01002496	338	523	186
ACOL01002500	418	674	257
ACOL01002503	242	674	433
ACOL01002528	183	371	189
ACOL01002531	14	175	162
ACOL01002559	421	660	240
ACOL01002608	403	660	258
ACOL01002618	17	322	306
ACOL01002641	466	658	193
ACOL01002767	128	292	165
ACOL01002774	406	644	239
ACOL01002783	454	643	190
ACOL01002790	1	287	287
ACOL01002846	194	637	444
ACOL01002850	127	522	396
ACOL01002893	1	351	351
ACOL01002929	340	629	290
ACOL01002935	523	629	107
ACOL01003009	1	143	143
ACOL01003010	1	451	451
ACOL01003027	155	475	321
ACOL01003039	2	621	620
ACOL01003125	1	615	615
ACOL01003144	56	325	270
ACOL01003156	318	485	168
ACOL01003166	552	612	61
ACOL01003195	20	439	420
ACOL01003197	1	610	610
ACOL01003210	1	312	312
ACOL01003219	1	608	608
ACOL01003239	498	607	110
ACOL01003307	1	365	365
ACOL01003314	370	516	147
ACOL01003317	485	601	117
ACOL01003364	482	598	117
ACOL01003432	6	134	129
ACOL01003450	189	593	405
ACOL01003454	1	595	595
ACOL01003456	3	595	593
ACOL01003474	372	593	222
ACOL01003480	1	593	593
ACOL01003514	1	515	515
ACOL01003591	412	585	174
ACOL01003625	23	193	171
ACOL01003641	196	585	390
ACOL01003650	38	385	348
ACOL01003680	1	376	376
ACOL01003704	223	579	357
ACOL01003714	1	120	120
ACOL01003744	1	282	282
ACOL01003767	390	578	189
ACOL01003858	1	380	380
ACOL01003867	462	572	111
ACOL01003869	1	574	574
ACOL01003894	13	96	84
ACOL01003931	498	569	72
ACOL01004016	384	563	180
ACOL01004062	1	77	77
ACOL01004078	1	360	360
ACOL01004102	182	511	330
ACOL01004139	1	382	382
ACOL01004163	164	556	393
ACOL01004176	108	260	153
ACOL01004193	1	353	353
ACOL01004245	46	553	508
ACOL01004271	1	189	189
ACOL01004291	76	381	306
ACOL01004305	130	285	156
ACOL01004308	174	551	378
ACOL01004324	361	550	190
ACOL01004327	1	550	550
ACOL01004330	43	378	336
ACOL01004360	1	173	173
ACOL01004398	11	151	141
ACOL01004432	317	505	189
ACOL01004456	25	435	411
ACOL01004496	235	378	144
ACOL01004521	116	541	426
ACOL01004548	1	380	380
ACOL01004578	1	303	303
ACOL01004618	171	536	366
ACOL01004640	169	534	366
ACOL01004652	1	373	373
ACOL01004655	1	534	534
ACOL01004688	154	270	117
ACOL01004699	1	144	144
	269	532	264
ACOL01004764	1	529	529
ACOL01004765	468	527	60
ACOL01004767	388	528	141
ACOL01004785	153	344	192
ACOL01004828	72	526	455
ACOL01004858	341	523	183
ACOL01004877	1	398	398
ACOL01004911	214	523	310
ACOL01004924	62	523	462
ACOL01004945	1	153	153
ACOL01004970	306	509	204
ACOL01005025	342	518	177
ACOL01005128	237	362	126
ACOL01005147	1	303	303
ACOL01005177	439	510	72
ACOL01005233	130	509	380
ACOL01005286	1	506	506
ACOL01005300	20	322	303
ACOL01005313	1	505	505
ACOL01005346	270	497	228
ACOL01005391	119	226	108
ACOL01005429	1	407	407

## Sheet: b) TE predicted as CDS
Chromosome accession number	CDS boundaries
ACOL01000033	16073	16399
ACOL01000036	110	1798
ACOL01000052	14007	14324
ACOL01000151	6079	7758
ACOL01000177	4946	5224
ACOL01000251	2085	2489
ACOL01000321	3309	4073
ACOL01000332	32	796
ACOL01000406	3022	3213
ACOL01000427	2476	2910
ACOL01000492	1273	2037
ACOL01000532	3	512
ACOL01000560	409	1173
ACOL01000594	1580	2014
ACOL01000761	1	320
ACOL01000864	1	1107
ACOL01000891	476	898
ACOL01001111	508	804
ACOL01001171	626	1045
ACOL01001280	2	979
ACOL01001398	385	567
ACOL01001424	683	865
ACOL01001585	184	708
ACOL01001619	64	525
ACOL01001915	1	320
ACOL01001982	118	750
ACOL01002018	170	367
ACOL01002237	247	606
ACOL01002505	1	502
ACOL01002537	24	290
ACOL01002558	1	643
ACOL01002630	1	477
ACOL01002753	1	484
ACOL01002906	1	474
ACOL01002909	166	630
ACOL01003124	3	599
ACOL01003501	43	300
ACOL01003783	1	578
ACOL01004567	163	402
ACOL01004840	2	442
ACOL01004879	1	477
ACOL01005027	3	431

[truncated: 4 more sheets: b) add predicted TE, c) mispredicted TIS, c) Falsely predicted genes, c) unpredicted genes]
