# Supplementary material for: MicroAnnot: A Dedicated Workflow for Accurate Microsporidian Genome Annotation
Source: Preprints.org preprint supplement (doi:10.20944/preprints202310.1822.v1), 2023-10-30
Supplement: Supplementary file 4 [file Supplementary_Table_S4.xlsx]

## Sheet: a) corrected TIS
chromosome accession number	correct CDS boundaries		mispredicted CDS boundaries by microannot		CDS size difference
ABGB01000001	1	661
	24253	25008
	27152	27916	27098	27916	54		red :Bad TIS predicted by MicroAnnot
	29173	29808					green : good TIS predicted by MicroAnnot
	30800	32701					orange : warning for manual annotation
	60646	61881
	66196	66798	66127	66798	69
	70524	71102
	84034	84327
	84386	84841
	85725	86195
	112081	112602
ABGB01000002	10239	10568	10239	10583	15
	26963	27937
	31582	32811
	58986	59429	58986	59543	114
	59679	60536
	63623	64633
	64825	66159
	83462	83716
	83735	84904
ABGB01000003	7361	7753
	14003	14548	13916	14548	87
	25504	26607
	30494	34249
	56664	57488	56664	57518	30
	60909	63491
	65843	66238	65771	66238	72
ABGB01000004	5703	6620	5661	6620	42
	9257	10351
	11919	12569
	14695	15360
	23092	23790	23092	23802	12
	29972	32041	29972	32077	36
	37793	38404	37751	38404	42
	44663	45805	44636	45805	27
	46758	48404
	57222	57833
	60684	61283
	65981	72691
	73100	73822	73100	73864	42
	79192	79857	79156	79857	36
ABGB01000005	3374	4069
	12949	13791
	22343	22882	22292	22882	51
	33669	34193
ABGB01000009	452	1924	452	1978	54
ABGB01000014	1940	2776
	2855	3586	2855	3607	21
	5576	6106
	7633	8286
	13890	14789
	33225	33737
	35667	36185
	48483	49340
	60657	61325
	84910	85284	84910	85374	90
	99271	99708	99271	99741	33
	100695	101924	100653	101924	42
	102256	103233
	128328	129071	128280	129071	48
ABGB01000015	5081	5695	5081	5740	45
	58420	59073
	61821	62498
	66706	67851
	68939	70444
	99129	101270
	101374	101739
	102679	103011
	105363	106439
	112499	113728
ABGB01000016	4985	6013
	10513	11210	10797	11249	-245
	20979	21437	20979	21494	57
	34548	35660
	64398	66286	64398	66176	-110
	72719	73159
	80592	81233	80565	81233	27
	108209	108994
ABGB01000017	722	1987
	4795	6300
	6580	9714
	56653	57312
	58670	59194
	59807	60856	59774	60856	33
	71934	72554
	79785	80585	79785	80624	39
ABGB01000018	3823	5268
	30334	30585
	41085	42218
	54677	55684
ABGB01000019	3994	4359	3994	4491	132
	5705	6235	5894	6235	-189
	20903	22375
	28221	28862	28221	28874	12
	36893	38830
	39086	39586	39086	39643	57
	39718	41745
ABGB01000020	4144	5013
	12530	13936
	26147	26623
	29848	30630
	30631	31158
	32448	33815
	33879	35435	33822	35435	57
	35451	36521	35451	36533	12
	40590	41414
	41478	43949
ABGB01000021	1002	1637
	7053	7262
	7366	7854
	24188	25366	24185	25366	3
ABGB01000022	28508	29008	28508	29023	15
ABGB01000023	2070	2852
	3758	4105
	15299	16987	15266	16987	33
	20081	20362
ABGB01000024	17141	18229
	18279	18602
	19516	20481
	22709	23389	22628	23389	81
	25186	25578	25186	25617	39
ABGB01000025	13252	13656
	15677	15886
	20086	20790	20086	20811	21
ABGB01000026	18554	19669
	24590	26689	24590	26704	15
ABGB01000027	10912	11415
	20600	22768
	25071	26603
ABGB01000028	6407	9184
ABGB01000029	5532	6747	5532	6389	-358
	25301	25734	25301	25630	-104
ABGB01000030	20403	20945	20403	20987	42
	23535	25373	23535	25418	45
ABGB01000031	17416	18414
	19084	20157	19099	20157	-15
	19084	20157	19099	20157	-15
	20255	21268
ABGB01000032	16010	17503
	21343	22123	21386	22123	-43
ABGB01000033	17918	21076
ABGB01000035	10452	12200
ABGB01000036	5158	5754	5119	5754	39
	16162	17808	16162	16920	-888
ABGB01000037	1514	4489
	9581	9946
	9978	11909
	14464	15222
	15308	16288	15260	16288	48
ABGB01000038	2845	3543
	11713	13746	11677	13746	36
ABGB01000039	11875	12372
ABGB01000040	1535	2622
	6389	6778
ABGB01000041	3368	3781	3368	3799	18
	4056	5636
	5867	7330	5999	7330	-132
ABGB01000042	1896	2537	1776	2537	120
	2546	3361	2546	3397	36
ABGB01000043	8978	9466
ABGB01000045	5609	7075
	7422	8641	7512	8641	-90
ABGB01000046	1888	2352
	2378	3826
	3870	5279
ABGB01000048	4730	5326	4730	5437	111
ABGB01000050	2760	3755
ABGB01000052	675	1652	675	1694	42
ABGB01000053	2603	4531
	4712	5401	GENE NOT PREDICTED
ABGB01000055	3668	4375
ABGB01000078	854	2089
ABGB01000080	1	331
ABGB01000099	738	1007	GENE NOT PREDICTED
ABGB01000114	351	1328
ABGB01000130	1399	2010
ABGB01000137	787	2016
ABGB01000138	1282	1746	1282	2010	264
ABGB01000142	1022	1702
ABGB01000154	687	1724
ABGB01000166	762	1646	762	1721	75
ABGB01000173	1289	1870
ABGB01000180	49	684
ABGB01000182	1155	1370
ABGB01000187	363	1385
ABGB01000197	171	582
ABGB01000210	914	1300	872	1300	42
	1367	1823
ABGB01000218	653	1341	772	1341	-119
ABGB01000229	262	1083	262	1509	426
ABGB01000238	1	668
ABGB01000262	143	778
ABGB01000265	217	1170
ABGB01000285	867	1634
ABGB01000286	1	841
ABGB01000302	322	1026
ABGB01000342	356	1550
ABGB01000370	510	1502
ABGB01000411	564	1211
ABGB01000422	1	297
ABGB01000424	279	887	180	887	99
ABGB01000448	407	877	389	877	18
ABGB01000472	722	1147
ABGB01000485	816	1307
ABGB01000496	298	1107
ABGB01000519	645	914
ABGB01000523	23	436
ABGB01000548	755	988
ABGB01000584	696	1304
ABGB01000613	65	556
ABGB01000671	161	1110	161	763	300
ABGB01000704	322	630
ABGB01000725	701	1097	701	1063	-34
ABGB01000730	86	1146	427	1146	-341
ABGB01000755	256	504
ABGB01000805	849	1154
ABGB01000808	262	456
ABGB01000815	405	689
ABGB01000824	219	746	219	797	51
ABGB01000892	235	750	223	750	12
ABGB01000901	660	1203
ABGB01000913	173	1189
ABGB01000925	210	701
ABGB01001019	521	937
ABGB01001058	155	535
ABGB01001069	198	920
ABGB01001071	1	961
ABGB01001118	107	838
ABGB01001124	496	969
ABGB01001140	297	923
ABGB01001150	245	904
ABGB01001184	101	514
ABGB01001194	1	945
ABGB01001237	9	521
ABGB01001354	154	1088
ABGB01001378	487	870
ABGB01001479	556	825
ABGB01001492	314	977	197	977	117
ABGB01001615	300	734

## Sheet: a) falsely predicted genes
chromosome accession number	CDS boundaries		CDS predicted by Microannot
ABGB01000001	98398	98745	NO
ABGB01000002	64606	64791	NO
ABGB01000003	52	156	NO
ABGB01000004	72908	73075	NO		red :bad gene predicted by MicroAnnot
ABGB01000014	104727	104891	NO		green : Bad gene not predicted by MicroAnnot
ABGB01000015	82257	82574	NO		orange : warning for manual annotation
ABGB01000018	29715	29948	NO
ABGB01000018	71742	71903	NO
ABGB01000016	10513	10770	NO
ABGB01000028	14195	14314	NO
ABGB01000028	15182	15349	NO
ABGB01000028	15740	15943	NO
ABGB01000031	8381	8575	NO
ABGB01000033	2827	2979	NO
ABGB01000033	9068	9292	NO
ABGB01000034	4726	4974	NO
ABGB01000036	16162	17406	WARNING
ABGB01000040	2152	2622	NO
ABGB01000043	5082	5270	NO
ABGB01000045	7334	7534	NO
ABGB01000050	5152	5400	NO
ABGB01000053	5108	5401	NO
ABGB01000057	3720	3914	NO
ABGB01000059	44	673	NO
ABGB01000065	1199	1861	NO
ABGB01000065	2243	2551	NO
ABGB01000082	1196	1528	NO
ABGB01000091	610	714	NO
ABGB01000091	1713	1883	NO
ABGB01000093	514	738	YES
ABGB01000111	281	508	NO
ABGB01000111	541	867	NO
ABGB01000137	899	1078	NO
ABGB01000150	1188	1394	NO
ABGB01000150	1415	1618	NO
ABGB01000153	759	929	NO
ABGB01000157	1025	1309	NO
ABGB01000183	10	621	YES
ABGB01000185	473	631	NO
ABGB01000200	169	423	NO
ABGB01000202	1658	1798	NO
ABGB01000210	545	769	NO
ABGB01000212	261	467	NO
ABGB01000218	175	465	NO
ABGB01000220	1575	1751	NO
ABGB01000221	544	762	NO
ABGB01000222	1495	1656	NO
ABGB01000226	1300	1494	NO
ABGB01000226	1509	1736	NO
ABGB01000231	1386	1739	NO
ABGB01000232	45	155	NO
ABGB01000232	341	448	NO
ABGB01000235	1078	1308	NO
ABGB01000244	1163	1297	NO
ABGB01000245	605	805	NO
ABGB01000245	1526	1681	NO
ABGB01000250	1318	1617	NO
ABGB01000253	47	454	NO
ABGB01000255	210	443	NO
ABGB01000261	1217	1309	NO
ABGB01000262	881	991	NO
ABGB01000264	272	400	NO
ABGB01000267	1357	1488	NO
ABGB01000268	1146	1271	NO
ABGB01000268	1300	1461	NO
ABGB01000270	1242	1373	NO
ABGB01000280	383	571	NO
ABGB01000280	769	873	NO
ABGB01000283	1126	1446	NO
ABGB01000284	1184	1378	NO
ABGB01000286	900	1205	NO
ABGB01000287	1	159	NO
ABGB01000289	138	593	NO
ABGB01000289	590	703	NO
ABGB01000295	167	376	NO
ABGB01000299	170	409	NO
ABGB01000320	17	121	NO
ABGB01000320	118	267	NO
ABGB01000322	34	282	NO
ABGB01000329	14	148	NO
ABGB01000330	47	151	NO
ABGB01000330	148	390	NO
ABGB01000334	1	223	NO
ABGB01000335	1172	1432	NO
ABGB01000350	1252	1449	NO
ABGB01000353	1251	1442	NO
ABGB01000364	399	710	NO
ABGB01000367	1147	1308	NO
ABGB01000371	986	1285	NO
ABGB01000373	1186	1473	NO
ABGB01000388	1252	1401	NO
ABGB01000391	1236	1370	NO
ABGB01000393	208	441	NO
ABGB01000398	906	1280	NO
ABGB01000399	1178	1315	NO
ABGB01000414	1097	1369	NO
ABGB01000420	51	338	NO
ABGB01000424	910	1305	YES
ABGB01000428	1210	1353	NO
ABGB01000432	868	1008	YES
ABGB01000433	108	248	NO
ABGB01000441	341	451	NO
ABGB01000445	617	796	NO
ABGB01000451	87	197	NO
ABGB01000458	50	169	NO
ABGB01000458	226	381	NO
ABGB01000459	20	175	NO
ABGB01000466	1	173	NO
ABGB01000476	435	614	NO
ABGB01000477	12	131	NO
ABGB01000477	157	306	NO
ABGB01000485	10	114	NO
ABGB01000495	1056	1187	NO
ABGB01000501	484	711	NO
ABGB01000504	497	625	NO
ABGB01000512	48	182	NO
ABGB01000513	160	561	NO
ABGB01000519	1209	1337	NO
ABGB01000522	738	866	NO
ABGB01000526	1086	1214	NO
ABGB01000534	1123	1239	NO
ABGB01000535	1	251	NO
ABGB01000551	1176	1307	NO
ABGB01000553	54	263	NO
ABGB01000559	1134	1283	NO
ABGB01000565	61	168	NO
ABGB01000586	12	116	NO
ABGB01000629	945	1133	NO
ABGB01000636	914	1063	NO
ABGB01000637	52	156	NO
ABGB01000652	1074	1232	NO
ABGB01000653	200	475	NO
ABGB01000653	485	598	NO
ABGB01000683	1134	1256	NO
ABGB01000686	457	561	NO
ABGB01000698	605	889	NO
ABGB01000700	1	170	NO
ABGB01000734	934	1244	NO
ABGB01000776	1	162	NO
ABGB01000782	341	805	NO
ABGB01000794	1	197	NO
ABGB01000893	780	1007	NO
ABGB01000895	1	168	NO
ABGB01000916	10	129	NO
ABGB01000971	959	1084	NO
ABGB01001001	930	1163	NO
ABGB01001018	437	622	NO
ABGB01001018	913	1131	NO
ABGB01001021	1	156	NO
ABGB01001041	18	176	NO
ABGB01001041	305	613	NO
ABGB01001139	74	382	NO
ABGB01001146	1	153	NO
ABGB01001175	1	179	NO
ABGB01001218	633	935	NO
ABGB01001225	1	206	NO
ABGB01001241	253	393	NO
ABGB01001241	463	726	NO
ABGB01001244	561	1034	NO
ABGB01001262	816	1094	NO
ABGB01001300	796	1105	NO
ABGB01001304	1	168	NO
ABGB01001313	940	1044	NO
ABGB01001411	47	502	NO
ABGB01001462	241	354	NO
ABGB01001518	209	661	NO
ABGB01001578	1	159	NO
ABGB01001688	423	593	NO

## Sheet: a) unpredicted gene
chromosome accession number	correct CDS boundaries		CDS size
ABGB01000001	15835	16284	450
	41997	42326	330
	55495	55725	231		red : gene not predicted by MicroAnnot
	72018	72236	219		green : gene predicted by MicroAnnot
	76283	76552	270
	85345	85719	375
	102980	103237	258
ABGB01000002	17503	17793	291
	33867	34313	447
	77278	77481	204
	81399	81824	426
ABGB01000003	7791	8090	300
	18456	18698	243
	69904	70131	228
ABGB01000004	10415	10579	165
	22652	23077	426
	23873	24235	363
	80271	80540	270
ABGB01000005	39019	39315	297
ABGB01000013	352	672	321
ABGB01000014	1627	1956	330
	33033	33218	186
	61371	61568	198
	101993	102232	240
	104260	105045	786
	111141	111434	294
ABGB01000015	24139	24414	276
	36425	36643	219
	107104	107562	459
ABGB01000016	11252	11656	405
	14169	14456	288
	35671	36021	351
	38430	38876	447
	42414	42641	228
	57770	58285	516
	86816	87460	645
	87508	87702	195
	94533	95168	636
	101791	102069	279
ABGB01000017	4090	4305	216
	55965	56180	216
ABGB01000018	34655	34942	288
ABGB01000019	11448	11912	465
	19745	20152	408
	31061	31567	507
	42871	43185	315
ABGB01000020	5052	5216	165
	5317	5562	246
ABGB01000021	20670	20951	282
	31411	31719	309
	25489	25947	459
ABGB01000022	3528	3764	237
ABGB01000023	8995	9387	393
ABGB01000024	6106	6525	420
ABGB01000027	18791	19045	255
ABGB01000028	15112	15978	867
ABGB01000031	8189	9016	828
ABGB01000032	22222	22656	435
ABGB01000033	9174	9623	450
ABGB01000036	4682	5038	357
	5773	6309	537
ABGB01000037	4484	4780	297
ABGB01000039	15669	15893	225
ABGB01000048	3741	4157	417
ABGB01000057	2662	2985	324
	3044	3832	789
ABGB01000341	1036	1296	261
ABGB01000370	217	462	246
ABGB01000541	414	845	432
ABGB01001346	571	843	273

## Sheet: a) FS, SE & pseudogene
chromosome accession number	correct CDS boundaries		comment
ABGB01000001	114165	114765
ABGB01000002	97661	98410
ABGB01000003	57577	58501
	68936	69888
	83572	83905	GENE NOT PREDICTED
ABGB01000006	1	1203
ABGB01000008	1331	3057			red : Frameshift, sequence error or pseudogene not predicted by MicroAnnot
ABGB01000013	757	1227			green : Frameshift, sequence error or pseudogene predicted by MicroAnnot
ABGB01000016	10513	11210			orange : warning for manual annotation
	64398	66286
ABGB01000019	56354	59762
ABGB01000029	5532	6747
	25301	25734
ABGB01000032	2364	4042
	21343	22123
ABGB01000034	1	1123
ABGB01000036	16162	17808
ABGB01000040	1535	2622
ABGB01000041	5867	7330
ABGB01000053	4712	5401	GENE NOT PREDICTED
ABGB01000055	1	1089
ABGB01000137	787	2016
ABGB01000197	171	582
ABGB01000218	653	1341
ABGB01000238	1	668
ABGB01000258	1	1681
ABGB01000279	1	391	GENE NOT PREDICTED
ABGB01000288	73	1624
ABGB01000296	980	1613
ABGB01000612	222	1295
ABGB01000671	161	1110
ABGB01000725	701	1097
ABGB01000730	86	1146
ABGB01000812	1	429	GENE NOT PREDICTED
ABGB01000846	667	1218	GENE NOT PREDICTED
ABGB01000901	660	1203
ABGB01001071	1	961
ABGB01001190	1	584
ABGB01001340	1	956
ABGB01001453	1	941
ABGB01001525	16	903
ABGB01001621	458	818	GENE NOT PREDICTED
ABGB01001682	1	206	GENE NOT PREDICTED

## Sheet: b) add corrected TIS
chromosome accession number	correct CDS boundaries
ABGB01000001	50877	51824
ABGB01000001	78227	79132
ABGB01000001	99545	100978
ABGB01000001	103286	107899
ABGB01000003	21814	23304
ABGB01000005	30726	32057
ABGB01000015	57661	58389
ABGB01000016	14570	15307
ABGB01000017	47272	47541
ABGB01000017	49785	50144
ABGB01000017	68566	69264
ABGB01000019	11918	13009
ABGB01000020	38406	39122
ABGB01000020	56546	57580
ABGB01000021	1695	2189
ABGB01000029	19475	20143
ABGB01000030	20999	21823
ABGB01000042	6538	8139
ABGB01000043	2276	3040
ABGB01000049	6718	7071
ABGB01000051	5887	6465
ABGB01000295	596	1096
ABGB01000430	251	1312
ABGB01000458	498	995
ABGB01000549	424	1320
ABGB01000784	221	604

## Sheet: b) add unpredicted gene
Chromosome accession number	correct CDS boundaries		CDS size	comment
ABGB01000004	15365	15673	309
ABGB01000022	27742	27837	96
ABGB01000037	13047	13361	315
ABGB01000046	39	290	252
ABGB01000048	1140	1472	333
ABGB01000102	1	92	92	EXTREMITY
ABGB01000168	827	1282	456
ABGB01000309	1031	1225	195
ABGB01000378	877	1200	324
ABGB01000556	1	83	83	EXTREMITY
ABGB01001028	264	569	306
ABGB01001102	311	616	306
ABGB01001136	515	820	306
ABGB01001204	843	1067	225
ABGB01001392	974	1069	96	EXTREMITY

## Sheet: b) add falsely predicted gene
chromosome accession number	CDS boundaries		cds size
ABGB01000082	861	1121	261
ABGB01000085	2045	2239	195
ABGB01000222	116	328	213
ABGB01000687	293	586	294
ABGB01000814	2	160	159
ABGB01001228	960	1127	168
ABGB01001523	709	912	204
ABGB01001682	1	206	206

## Sheet: c) mispredicted TIS
chromosome accession number	correct CDS boundaries		mispredicted CDS boundaries by MicroAnnot		CDS size difference	comment
ABGB01000001	37761	38882	37785	38882	-24
	52944	54683	52953	54683	-9
	73709	74284	73727	74284	-18
	83187	83972
	113857	114138	113878	114138	-21
	114165	114765	114418	114765	-253	FS NOT PREDICTED
ABGB01000002	7494	9506
	28023	29876	28071	29876	-48
	47620	48051	47644	48051	-24
	49157	49888	49112	49888	45
	55174	55968	55174	56016	48
	81811	83445
	97661	98410	97661	98173	-237	SE NOT PREDICTED
ABGB01000003	3019	5622	3019	5610	-12
	7791	8090	7761	8090	30
	57577	58501	57577	58263	-238	FS NOT PREDICTED
	68936	69888
	79871	81040
ABGB01000004	6656	7222	6638	7222	18
	20204	21241	20204	21058	-183
	53498	56236	53498	56257	21
ABGB01000005	42394	43050
ABGB01000006	1	1203
	1831	4716	1915	4716	-84
ABGB01000008	1331	3057	1331	2890	-167	SE NOT PREDICTED
ABGB01000013	757	1227	757	1116	-111	FS NOT PREDICTED
ABGB01000014	10463	11095	10463	11128	33
	15869	17980
	62071	63531	62086	63531	-15
	69593	71014	69650	71014	-57
	74269	74946	74317	74946	-48
	95900	97969	95900	97873	-96
ABGB01000015	74719	76143	74698	76143	21
	101876	102628	101747	102628	129
ABGB01000016	12319	12948	12274	12948	45
	17062	20874
	58297	58857	58297	58890	33
	74949	75311	74964	75311	-15
	103105	104793	103111	104793	-6
ABGB01000017	48290	49246	48290	49213	-33
	53756	54901	53756	54961	60
	75527	77827
ABGB01000018	66760	68097	66760	68160	63
	68162	69208	68129	69208	33
ABGB01000019	15398	16525	15416	16525	-18
	16596	17630	16596	17606	-24
	51920	52675
ABGB01000020	20694	21143
	54508	55179	54508	55134	-45
ABGB01000021	31747	32052	31747	32094	42
	32101	33111	32212	33111	-111
	33135	33716	33135	33791	75
ABGB01000022	2316	2894	2247	2894	69
	8278	9015	8278	8979	-36
ABGB01000023	5033	5539	5048	5539	-15
	10973	13009
	18886	19884	18874	19884	12
	20945	22357	21017	22357	-72
ABGB01000024	20498	20932	20498	20917	-15
	23416	23904
ABGB01000025	1447	2220	1447	2238	18
	23444	25786	23417	25786	27
ABGB01000026	22618	23340	22618	23376	36
	23404	24117	23404	24108	-9
ABGB01000028	1144	1740	1066	1740	78
ABGB01000029	14555	15400
	20925	21461
ABGB01000031	1799	3451	1799	3418	-33
ABGB01000032	2364	4042
	8265	8990	8265	8987	-3
	17548	19218	17548	19293	75
ABGB01000034	1	1123	146	1123	-145	FS NOT PREDICTED
	9867	11354	9858	11354	9
ABGB01000047	6524	7579	6524	7510	-69
ABGB01000052	4428	6482	4428	6470	-12
ABGB01000055	1	1089
ABGB01000057	3044	3832
ABGB01000068	1691	2281
ABGB01000108	981	1934	996	1934	-15
ABGB01000109	993	2171
ABGB01000127	1434	2015
ABGB01000162	109	1068	112	1068	-3
ABGB01000288	73	1624
ABGB01000295	605	1096	596	1096	9
ABGB01000296	980	1613	980	1540	-73	SE NOT PREDICTED
ABGB01000375	357	1151
ABGB01000549	469	1320	424	1320	69
ABGB01000568	240	818
ABGB01000612	222	1295
ABGB01000752	89	277
ABGB01000812	436	885
ABGB01001074	88	1166	1	1166	87
ABGB01001183	872	1141	872	1120	-21
ABGB01001198	1	991	1	1138	147
ABGB01001340	1	956
ABGB01001453	1	941	270	941	-269	SE NOT PREDICTED
ABGB01001525	16	903	16	768	-135	SE NOT PREDICTED

## Sheet: c) Falsely predicted genes
Chromosome accession number	correct CDS boundaries		CDS size	comment
ABGB01000081	608	1543		LOW COMPLEXITY (GLIMMER)
ABGB01000090	1005	1352		LOW COMPLEXITY (GLIMMER)
ABGB01000093	1246	1662		LOW COMPLEXITY (GLIMMER)
ABGB01000111	1	632		LOW COMPLEXITY (GLIMMER)
ABGB01000135	1	560		LOW COMPLEXITY (GLIMMER)
ABGB01000146	1	500		LOW COMPLEXITY (GLIMMER)
ABGB01000147	1	503		LOW COMPLEXITY (GLIMMER)
ABGB01000177	1	539		LOW COMPLEXITY (GLIMMER)
ABGB01000182	1	597		LOW COMPLEXITY (GLIMMER)
ABGB01000246	1203	1715		LOW COMPLEXITY (GLIMMER)
ABGB01000269	1015	1659		LOW COMPLEXITY (GLIMMER)
ABGB01000273	20	337		LOW COMPLEXITY (GLIMMER)
ABGB01000282	1	630		LOW COMPLEXITY (GLIMMER)
ABGB01000324	1261	1566		LOW COMPLEXITY (GLIMMER)
ABGB01000364	134	553		LOW COMPLEXITY (GLIMMER)
ABGB01000096	1115	1477		BAD STRAND
ABGB01000594	172	360		BAD STRAND
ABGB01000739	1	507		GLIMMER
ABGB01000806	151	513		BAD STRAND
ABGB01000909	1	339		LOW COMPLEXITY (GLIMMER)
ABGB01000930	1	489		BAD STRAND
ABGB01001030	643	1173		BAD READING FRAME
ABGB01001044	664	1125		BAD STRAND
ABGB01001118	856	1155		BAD STRAND
ABGB01001143	581	1150		LOW COMPLEXITY (GLIMMER)

## Sheet: c) unpredicted genes
chromosome accession number	correct CDS boundaries		CDS size	comment
ABGB01000001	16532	17347	816	OVERLAP
	70179	70517	339
ABGB01000003	83572	83905	334	FRAMESHIFT NOT PREDICTED
ABGB01000017	9739	11460	1722	OVERLAP
	59228	59698	471
ABGB01000019	13201	13593	393
ABGB01000023	14869	15267	399	OVERLAP
	20612	20797	186
ABGB01000026	27656	27821	166	EXTREMITY
ABGB01000046	5235	5861	627	OVERLAP
ABGB01000052	2787	3356	570	OVERLAP
ABGB01000053	4712	5401	690	FRAMESHIFT NOT PREDICTED
ABGB01000057	1681	2082	402	OVERLAP
ABGB01000065	1	164	164	EXTREMITY
ABGB01000251	1	182	182	EXTREMITY
ABGB01000279	1	391	391	EXTREMITY
ABGB01000305	1	238	238	EXTREMITY
ABGB01000325	1	234	234	EXTREMITY
ABGB01000388	488	829	342
ABGB01000419	994	1435	442	EXTREMITY
ABGB01000569	870	1112	243
ABGB01000812	1	429	429	EXTREMITY
ABGB01000881	585	950	366
ABGB01000923	1	1063	1063	EXTREMITY
ABGB01000946	1	258	258	EXTREMITY
ABGB01000965	1	156	156	EXTREMITY
ABGB01000969	1	215	215	EXTREMITY
ABGB01001145	1	161	161	EXTREMITY
ABGB01001155	1	211	211	EXTREMITY
ABGB01001254	732	1121	390	EXTREMITY
ABGB01001269	951	1115	165	EXTREMITY
ABGB01001403	1	193	193	EXTREMITY
ABGB01001621	458	818	361	SEQUENCE ERROR NOT PREDICTED
